# Supplementary material for: Validation of a post-radiolabeling bioconjugation strategy for radioactive rare earth complexes with minimal structural footprint
Source: Royal Society of Chemistry journal article supplement (doi:10.1039/d2cc06128g), 2022-01-01
Supplement: d2cc06128g1.pdf [file d2cc06128g1.pdf]

# Validation of a post-radiolabeling bioconjugation strategy for radioactive rare earth complexes with minimal structural footprint

Raphael Lengacher, Alexia G. Cosby, Dariusz Śmiłowicz, Eszter Boros\*

## Contents

|                                                                    |    |
|--------------------------------------------------------------------|----|
| <b>1. General</b> .....                                            | 2  |
| <b>2. Literature</b> .....                                         | 3  |
| <b>3. Synthesis</b> .....                                          | 4  |
| <b>4. Kinetic Studies</b> .....                                    | 10 |
| <b>UV/Vis measurements</b> .....                                   | 10 |
| <b>Luminescence turn-on measurements</b> .....                     | 12 |
| <b>5. Radiochemistry</b> .....                                     | 13 |
| <b>Apparent Molar Activity</b> .....                               | 13 |
| <b>DTPA Challenge</b> .....                                        | 14 |
| <b>Thioconjugation experiments using radioactive species</b> ..... | 15 |
| <b>CRET Plate imaging</b> .....                                    | 16 |
| <b>6. In vivo studies</b> .....                                    | 17 |
| <b>PET imaging</b> .....                                           | 17 |
| <b>Biodistribution</b> .....                                       | 18 |
| <b>Metabolite analysis</b> .....                                   | 19 |
| <b>7. Spectra</b> .....                                            | 20 |

## 1. General

All starting materials were purchased from commercial sources and used without further purification. **NMR spectra** ( $^1\text{H}$ ,  $^{13}\text{C}$ ) were collected on a 700 MHz Advance III Bruker, 700 MHz, or 400 MHz Bruker instrument in deuterated solvents at 298 K; chemical shifts ( $\delta$ ) in ppm relative to residual solvent resonances ( $\text{CDCl}_3$   $^1\text{H}$ :  $\delta$  7.26,  $^{13}\text{C}$ :  $\delta$  77.16;  $\text{CD}_3\text{CN}$   $^1\text{H}$ :  $\delta$  : 1.96); coupling constants ( $J$ ) in Hz. Signal assignments are based on coupling constants, increment calculations and/or 2D-NMR experiments. Data was processed using TopSpin 4.1.4. Chemical shifts are reported as parts per million (ppm).

**Low resolution electrospray ionization (ESI) mass spectrometry** was carried out at the Stony Brook University Institute for Chemical Biology and Drug Discovery (ICB&DD) Mass Spectrometry Facility with an Agilent LC/MSD.

**High resolution ESI mass spectrometry** was carried out at the Stony Brook University Center for Advanced Study of Drug Action (CASDA) with a Bruker Impact II UHR QTOF MS system.

**UV-VIS** spectra were collected with the NanoDrop One C instrument. Spectra were recorded from 200 to 900 nm in a quartz cuvette with 1 cm path length.

**Luminescence measurements** were carried out on a Hitachi F-7100 FL spectrophotometer. Wavelength scans were collected by exciting at the appropriate wavelength (282 for Tb(III)) for antenna-mediated excitation and minimization of scattering interference. Emission spectra were collected from 300 to 800 nm, with 1.0 nm excitation and 5.0 nm emission slit widths, 1200 s scan time, 0.05 s response time, and PMT voltage = 400 V.

**ICP-OES** was carried out using an Agilent 5110 inductively coupled plasma optical emission spectrometer. A 10-point standard curve or a 6-point standard curve with respect to europium or terbium was used and fits were found to be at least R 2 of 0.999. Concentrations were back calculated to determine the stock sample concentration.

All **HPLC** purification and analytical methods were conducted using a binary solvent system in which solvent A was water + 0.1% TFA and solvent B was MeCN + 0.1% TFA. Preparative HPLC was carried out on a Phenomenex Luna C18 column (250 mm  $\times$  21.2 mm, 100 Å, AXIA packed) at a flow rate of 15 mL/min using a Shimadzu HPLC-20AR equipped with a binary gradient pump, UV-vis detector, and manual injector. UV absorption was recorded at 254 nm. Method A: Gradient: 0–1 min: 5% B; 1–14 min: 5–50% B; 14–23 min: 50–95% B; 23–26 min: 95% B; 26–27 min: 95–5% B; 27–30 min: 5% B. Flash chromatography was carried out using a Combi Flash Rf+ on a RediSep column (100 g HP C18 gold, CV: 87.7 mL, flow rate: 60 mL/min). Method B: Gradient: 1-2 min 10% B; 2-3 min: 10–20% B; 3–19 min: 20–25% B; 19 min: 25-100% B; 19-23 min: 100% B; 23 min: 100-10% B; 23-25 min: 10% B. Analytical HPLC was carried out on a Phenomenex Luna 5  $\mu\text{m}$  C18 column (150 mm  $\times$  3 mm, 100 Å, AXIA packed) at a flow rate of 0.8 mL/min using either a Shimadzu HPLC-20AR equipped with a binary gradient pump, UV-vis detector, autoinjector, and Laura radiodetector or Agilent 1260 Infinity II HPLC. UV absorption was recorded at 254 nm. Method C: (Shimadzu system) Gradient: 0–2 min: 5% B; 2–14 min: 5–95% B; 14–16 min: 95% B; 16–16.5 min: 95–5% B; 16.5–20 min 5% B. Method D: 0–16 min: 5–95% B

Analytical HPLC traces have been baseline corrected versus a blank measurement (Figure S1).

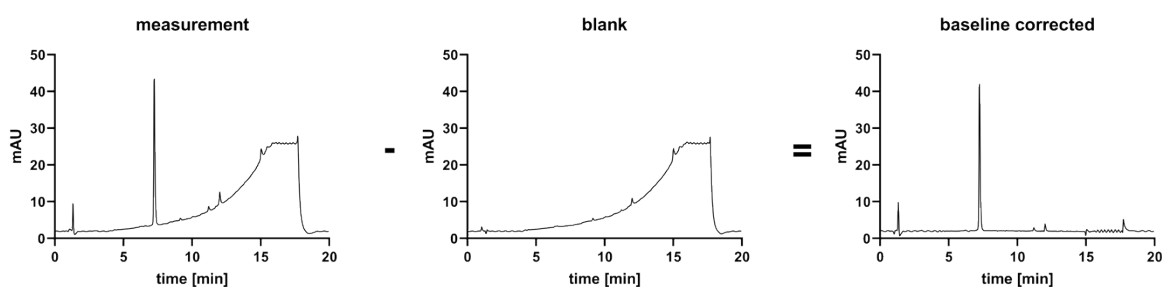

**Figure S1:** Baseline correction of HPLC traces versus a blank measurement on the example of compound [ $^{177}\text{Lu}$ ][Lu(DO3A-pic-SR $_2$ )].

## 2. Literature

### A Radiolabeling with cyclic chelators (Majkowska-Pilip, 2011):

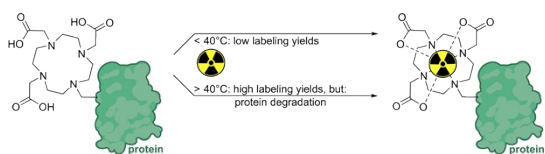

### B Radiolabeling with non-cyclic chelators (Chakravarty, 2014):

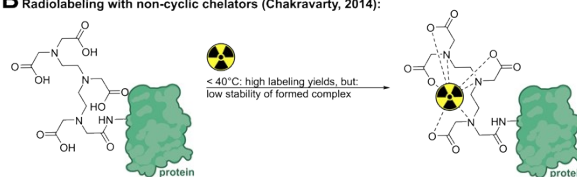

### C Post-labeling functionalisation (Rossin, 2020):

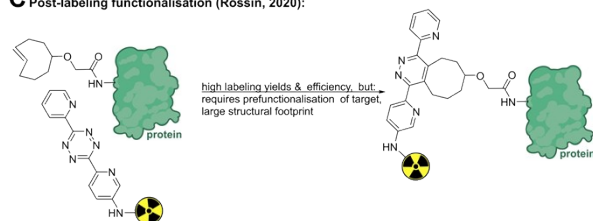

### D This work:

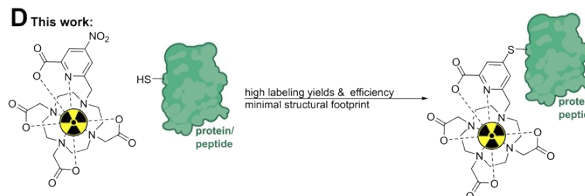

**Figure S2:** Previous radiolabelling strategies (A-C) and this work (D). **A:** Two-step approach first by conjugation of chelator to protein followed by radiometal coordination. Below  $40^{\circ}\text{C}$ , radiolabeling yields are usually low. **B:** Radiolabeling with non-cyclic chelators leads to good radiolabeling yields below  $40^{\circ}\text{C}$ , but stability of the radiocomplex is impaired, leading to loss of radioactive payload *in vivo*. **C:** Post-labeling strategy based on a tetrazine and trans-cyclooctene click reaction. This leads to high yields, but results in a big structural footprint and requires modification of the targeting vector. **D:** Post-labeling strategy presented in this work. This strategy incorporates high radiolabeling yields and produces a minimal structural footprint.

2011 Regueiro-Figueroa *et al.*

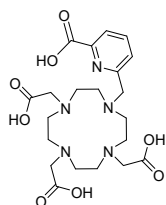

First reported DO3Apic synthesis  
DOTA analogue with  $q = 0$

2013 Gempf *et al.*

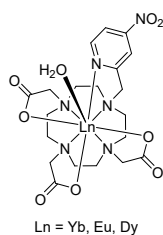

First report of cysteine selective  
conjugation  
Conjugation to small peptides and  
BSA  
Used as luminescent probes

2019 Shah *et al.*

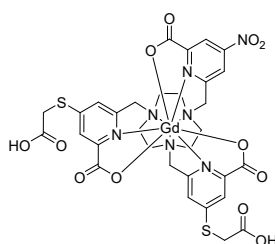

Gd spin label conjugated to protein  
homo dimer TRIM25cc  
used in nanometer-distance measurements  
by EPR

2020 Starck *et al.*

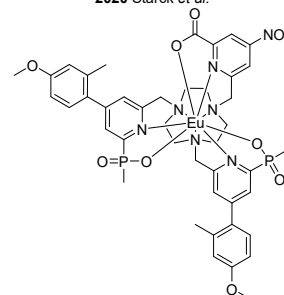

Luminescent probe conjugated to a  
ER targeting peptide

2019 Alucio-Sarduy *et al.*

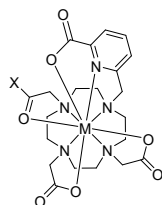

$X = \text{OH}, \text{DUPA}$   
 $M = {}^{135/132}\text{La}$

DO3Apic as chelator for radiometals  
and DUPA induced targeting of PSMA  
positive cancer cells *in vivo*

2021 Herath *et al.*

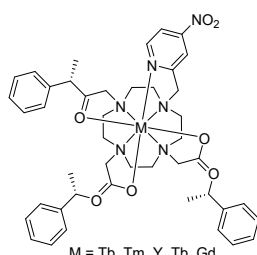

$M = \text{Tb}, \text{Tm}, \text{Y}, \text{Tb}, \text{Gd}$

Chiral Lanthanide tag as tool to probe  
proteins with multiple spectroscopic  
techniques such as NMR, EPR, and  
FRET

2021 Cosby *et al.*

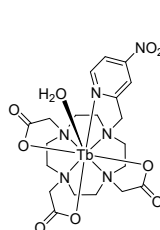

Tb(DO3Apic) as luminescent probe  
for  $\text{H}_2\text{S}$  detection

This work:

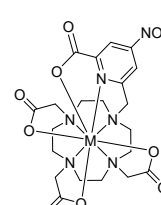

$M = \text{La}, \text{Tb}, \text{Eu}, {}^{177}\text{natLu}, {}^{86}\text{natY}, \text{Sc}$

DO3Apic-NO<sub>2</sub> for the introduction of  
rare-earth radioisotopes to biologic  
targeting vectors

**Figure S3:** Summary on previous work on the DO3Apic scaffold compared to this work.

### 3. Synthesis

The synthesis of **DO3A-pic-NO<sub>2</sub>** was carried out according to a slightly modified procedure from literature.<sup>1</sup>

#### Synthesis of **S1**

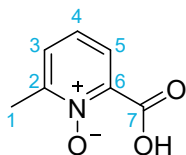

6-Methyl-pyridine-2-carboxylic acid (2.00 g, 14.5 mmol, 1 equiv.) was dissolved in anhydrous CH<sub>2</sub>Cl<sub>2</sub> (10 mL) at r.t., followed by addition of urea hydrogen peroxide (4.12 g, 43.8 mmol, 3 equiv.). The mixture was placed in an ice bath (0°C) and trifluoroacetic acid anhydride (6.18 mL, 43.7 mmol, 3 equiv.) was added dropwise. The solution was stirred at r.t. for 4 h, followed by addition of Na<sub>2</sub>SO<sub>4</sub> (aq., sat.). The resulting solution was extracted with CH<sub>2</sub>Cl<sub>2</sub>. The combined organic phases were dried over Na<sub>2</sub>SO<sub>4</sub>, filtered, and concentrated *in vacuo*, providing the title compound **S1** as a clear crystalline solid (1.58 g, 10.3 mmol, 71%), which was used without further purification in the next step. **<sup>1</sup>H NMR** (CDCl<sub>3</sub>, 700 MHz): δ 8.33 (dd, 1H, *J* = 7.29, 2.25 Hz, H<sub>4</sub>), 7.60-7.51 (m, 2H, H<sub>3,5</sub>), 2.65 (s, 3H, H<sub>1</sub>). **<sup>13</sup>C NMR** (CDCl<sub>3</sub>, 175 MHz): δ 161.61 (C<sub>q</sub>, 1 C, C<sub>7</sub>), 149.31 (C<sub>q</sub>, 1 C, C<sub>2</sub>), 137.06 (C<sub>q</sub>, 1 C, C<sub>6</sub>), 129.97 (CH<sub>1</sub>, 1 C, C<sub>3/5</sub>), 129.82 (CH<sub>1</sub>, 1 C, C<sub>5/3</sub>), 127.29 (CH<sub>1</sub>, 1 C, C<sub>4</sub>), 17.65 (CH<sub>3</sub>, 1 C, C<sub>1</sub>). **HR-ESI-MS**: [M+H]<sup>+</sup> = calc. m/z 154.0499, found: m/z 154.0500

#### Synthesis of **S2**

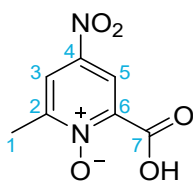

Concentrated H<sub>2</sub>SO<sub>4</sub> (34.6 mL, 650 mmol) was added dropwise to **S1** (5.38 g, 35 mmol) at -10°C (acetone/ice bath) while stirring. After 30 min, concentrated (70%) HNO<sub>3</sub> (44 mL, 734 mmol) was added dropwise over 18 min. The resulting slurry was brought to 110°C over 3 h. The reaction was stirred at 110°C for 3 days. The solution was allowed to cool to r.t. and then added slowly (over 1 h) to 400 mL ice, resulting in formation of a precipitate. The precipitate was filtered and dried, providing the title compound **S2** as a colourless solid (2.34 g, 11.8 mmol, 34%). **<sup>1</sup>H NMR** (CD<sub>3</sub>CN, 700 MHz): δ 8.79 (d, 1H, *J* = 3.14 Hz, H<sub>4</sub>), 8.48 (d, 1H, *J* = 3.12 Hz, H<sub>3</sub>), 2.65 (s, 1H, H<sub>1</sub>). **<sup>13</sup>C NMR** (CD<sub>3</sub>CN, 175 MHz): δ 160.02 (C<sub>q</sub>, 1 C, C<sub>7</sub>), 152.69 (C<sub>q</sub>, 1 C, C<sub>2</sub>), 145.15 (C<sub>q</sub>, 1 C, C<sub>4</sub>), 138.37 (C<sub>q</sub>, 1 C, C<sub>6</sub>), 123.65 (CH<sub>1</sub>, 1 C, C<sub>5</sub>), 120.54 (CH<sub>1</sub>, 1 C, C<sub>3</sub>), 17.05 (CH<sub>3</sub>, 1 C, C<sub>1</sub>). **HR-ESI-MS**: [M+H]<sup>+</sup> = calc. m/z 199.0349, found: m/z 199.0351

## Synthesis of S3

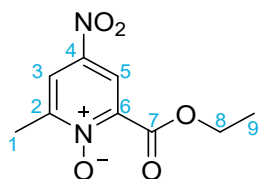

Anhydrous EtOH (32 mL, 140 equiv.) was added to **S2** (785.6 mg, 3.96 mmol, 1 equiv.) at r.t.. Concentrated H<sub>2</sub>SO<sub>4</sub> (0.85 mL, 1.59 mmol, 0.4 equiv.) was added and the solution was heated to 85°C for 3 d. The solution was allowed to cool to r.t., washed with NaHCO<sub>3</sub> (aq., 5 wt%, 2×), dried over Na<sub>2</sub>SO<sub>4</sub> and concentrated *in vacuo*, providing the title compound **S3** as a yellow solid (668.0 mg, 2.95 mmol, 74%). **<sup>1</sup>H NMR** (CDCl<sub>3</sub>, 700 MHz): δ 8.30 (s, 1H, H<sub>5</sub>), 8.18 (s, 1H, H<sub>3</sub>), 4.50 (q, 2H, *J* = 6.94 Hz, H<sub>8</sub>), 2.57 (s, 3H, H<sub>1</sub>), 1.43 (t, 3H, *J* = 6.46 Hz, H<sub>9</sub>). **<sup>13</sup>C NMR** (CDCl<sub>3</sub>, 175 MHz): δ 160.14 (C<sub>q</sub>, 1 C, C<sub>7</sub>), 152.43 (C<sub>q</sub>, 1 C, C<sub>6</sub>), 142.37 (C<sub>q</sub>, 1 C, C<sub>2</sub>), 140.37 (C<sub>q</sub>, 1 C, C<sub>4</sub>), 121.10 (CH<sub>1</sub>, 1 C, C<sub>5</sub>), 118.87 (CH<sub>1</sub>, 1 C, C<sub>3</sub>), 63.29 (CH<sub>2</sub>, 1 C, C<sub>8</sub>), 18.19 (CH<sub>2</sub>, 1 C, C<sub>1</sub>), 14.07 (CH<sub>3</sub>, 1 C, C<sub>9</sub>). **HR-ESI-MS**: [M+H]<sup>+</sup> = calc. *m/z* 227.0662, found: *m/z* 227.0664. Analytical data matches that reported previously.<sup>1</sup>

## Synthesis of S4

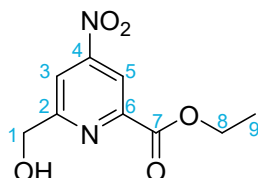

Anhydrous CHCl<sub>3</sub> (10 mL) was added to **S3** (64.0 mg, 0.28 mmol, 1 equiv.) at r.t.. Trifluoroacetic acid anhydride (0.8 mL, 5.7 mmol, 20 equiv.) was added dropwise at r.t., and the resulting mixture was heated to 60°C for 4.5 h. The solvent was evaporated. The residual material was redissolved in EtOH/H<sub>2</sub>O (1:1, 20 mL) and stirred at r.t. for 3 h. EtOH was evaporated and the aqueous solution was extracted with CH<sub>2</sub>Cl<sub>2</sub> (200 mL, 3×). The combined organic phases were dried over Na<sub>2</sub>SO<sub>4</sub> and concentrated *in vacuo*, providing the title compound **S4** as a dark yellow solid (59.6 mg, 0.28 mmol, 99%) used without further purification. **<sup>1</sup>H NMR** (CD<sub>3</sub>CN, 700 MHz): δ 8.52 (s, 1H, H<sub>5</sub>), 8.34 (s, 1H, H<sub>3</sub>), 4.86 (s, 2H, H<sub>1</sub>), 4.65 (q, *J* = 6.61 Hz, H<sub>8</sub>), 1.42 (t, *J* = 6.50 Hz, H<sub>9</sub>). **<sup>13</sup>C NMR** (CD<sub>3</sub>CN, 175 MHz): δ 165.94 (C<sub>q</sub>, 1 C, C<sub>7</sub>), 163.44 (C<sub>q</sub>, 1 C, C<sub>6</sub>), 155.72 (C<sub>q</sub>, 1 C, C<sub>4</sub>), 150.17 (C<sub>q</sub>, 1 C, C<sub>2</sub>), 115.90 (CH<sub>1</sub>, 1 C, C<sub>5</sub>), 115.81 (CH<sub>1</sub>, 1 C, C<sub>3</sub>), 63.96 (CH<sub>2</sub>, 1 C, C<sub>1</sub>), 62.28 (CH<sub>2</sub>, 1 C, C<sub>8</sub>), 13.46 (CH<sub>3</sub>, 1 C, C<sub>9</sub>). **HR-ESI-MS**: [M+H]<sup>+</sup> = calc. *m/z* 227.0662, found: *m/z* 227.0664

## Synthesis of DO3A-pic-NO<sub>2</sub>

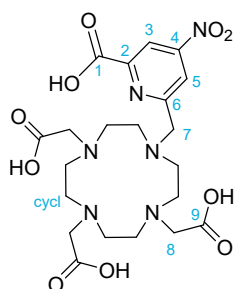

Ethyl 6-(hydroxymethyl)-4-nitropicolinate **S4** (59.0 mg, 0.26 mmol, 1 equiv.) was dissolved in anhydrous THF (10 mL) and placed under a N<sub>2</sub> atmosphere at 0°C. Anhydrous triethyl amine (109 µL, 0.78 mmol, 3 equiv.) was added, followed by dropwise addition of methanesulfonyl chloride (30.3 µL, 0.39 mmol, 1.5 equiv.). The reaction was stirred at 0°C for 30 min, followed by 1.5 h at r.t.. The mixture was concentrated, redissolved in CH<sub>2</sub>Cl<sub>2</sub>, washed consecutively with water and brine, dried over Na<sub>2</sub>SO<sub>4</sub>, and concentrated *in vacuo*, providing the title compound **S5** as a yellow oil used without purification in the next step.

Ethyl 6-(((methylsulfonyl)oxy)methyl)-4-nitropicolinate **S5** (80.0 mg, 0.26 mmol, 1 equiv.) was dissolved in anhydrous acetonitrile and added dropwise to a solution of <sup>t</sup>Bu-DO3A (135.3 mg, 0.26 mmol, 1 equiv.) and K<sub>2</sub>CO<sub>3</sub> (181 mg, 1.32 mmol, 5 equiv.) in anhydrous acetonitrile (10 mL). The mixture was heated to reflux for 2 h, filtered, and concentrated *in vacuo* yielding crude product used without purification (71.1 mg, 0.098 mmol). ESI-MS calcd. for C<sub>35</sub>H<sub>58</sub>N<sub>6</sub>O<sub>10</sub>: 722.42. Found: 723.2 [M+H]<sup>+</sup>. The protected macrocycle was then treated with 1.0 M NaOH (2 mL) and stirred overnight at r.t.. Following acidification to pH 2 with 15% HCl, the product was purified via semipreparative HPLC, the fractions containing product were pooled and the solvent was removed *in vacuo* and then immediately treated with TFA/CH<sub>2</sub>Cl<sub>2</sub> (2:1) and stirred at r.t. overnight. The crude material was purified using semipreparative HPLC (Rt = 10.1 min). Fractions containing pure material were collected, lyophilized, and immediately stored at -80°C to preserve material integrity (8.6 mg, 0.026 mmol). <sup>1</sup>H NMR (CD<sub>3</sub>OD, 400 MHz): δ 8.68 (s, 1H, H<sub>3</sub>), 8.56 (d, 1H, H<sub>5</sub>), 4.45 (br s, 2H, H<sub>7</sub>), 3.98 (m, 6H, H<sub>8</sub>), 3.56-3.17 (m, 16H, H<sub>cycl</sub>). HR-ESI-MS: [M+H]<sup>+</sup> = calc. m/z 527.2096, found: m/z 527.2087

## Synthesis of [RE(DO3A-pic-NO<sub>2</sub>)]<sup>-</sup> complexes

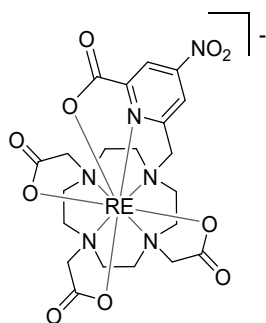

RE<sup>3+</sup>-salts (40 μmol, 2 equiv.) were added to a solution of **DO3A-pic-NO<sub>2</sub>** (20 μmol, 1 equiv.) in MeOH/H<sub>2</sub>O (1:1, pH = 6.5) and the resulting solution was stirred at r.t. overnight. The solution was lyophilized and the remaining solids were purified by SepPak. Yields were determined by ICP-OES.

**[La(DO3A-pic-NO<sub>2</sub>)]<sup>-</sup>**: Ln<sup>3+</sup>-salt: LaCl<sub>3</sub>, isolated yield after SepPak: 2240.1 nmol, 11%

HR-ESI-MS: [M+2H]<sup>+</sup> = calc. m/z 663.0925, found: m/z 663.0929

HPLC (Method C): R<sub>t</sub> = 2.27 min.

**[Tb(DO3A-pic-NO<sub>2</sub>)]<sup>-</sup>**: Ln<sup>3+</sup>-salt: TbOTf<sub>3</sub>, isolated yield after SepPak: 970.7 nmol, 5%

HR-ESI-MS: [M]<sup>-</sup> = calc. m/z 681.0964, found: m/z 681.0978

HPLC (Method C): R<sub>t</sub> = 2.03 min.

**[Eu(DO3A-pic-NO<sub>2</sub>)]<sup>-</sup>**: Ln<sup>3+</sup>-salt: EuOTf<sub>3</sub>, isolated yield after SepPak: 132.7557 nmol, 1%

HR-ESI-MS: HR-ESI-MS: [M]<sup>-</sup> = calc. m/z 675.0928, found: m/z 675.0944

HPLC (Method C): R<sub>t</sub> = 2.13 min.

**[Lu(DO3A-pic-NO<sub>2</sub>)]<sup>-</sup>**: Ln<sup>3+</sup>-salt: LuCl<sub>3</sub>·6 H<sub>2</sub>O, isolated yield after SepPak: 1313.2 nmol, 7%

HR-ESI-MS: [M+2H]<sup>+</sup> = calc. m/z 699.1269, found: m/z 699.1270

HPLC (Method C): R<sub>t</sub> = 1.62 min.

**[Sc(DO3A-pic-NO<sub>2</sub>)]<sup>-</sup>**: Ln<sup>3+</sup>-salt: ScCl<sub>3</sub>·6 H<sub>2</sub>O, isolated yield after SepPak: 476.4 nmol, 2%

HR-ESI-MS: [M+2H]<sup>+</sup> = calc. m/z 569.1421, found: m/z 569.1415

**[Y(DO3A-pic-NO<sub>2</sub>)]<sup>-</sup>**: Ln<sup>3+</sup>-salt: Y(NO<sub>3</sub>)<sub>3</sub>·6 H<sub>2</sub>O, isolated yield after SepPak: 617.4 nmol, 3%

HR-ESI-MS: [M+2H]<sup>+</sup> = calc. m/z 613.0920, found: m/z 613.0917

HPLC (Method C): R<sub>t</sub> = 1.98 min.

### Synthesis of [Lu(DO3A-pic-SR<sub>2</sub>)]<sup>-</sup>

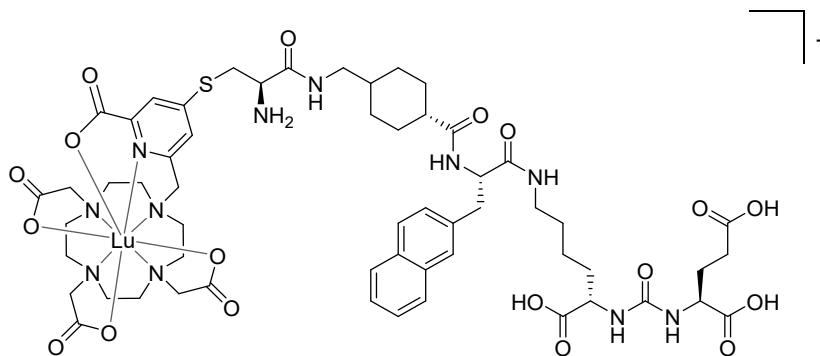

(((1S)-5-((2S)-2-(4-(((R)-2-amino-3-mercaptopropanamido)methyl)cyclohexane-1-carboxamido)-3-(naphthalen-2-yl)propanamido)-1-carboxypentyl)carbamoyl)-L-glutamic acid (30 nmol, 1 equiv.) was added to a solution of TCEP·HCl (37.5 nmol, 1.25 equiv.) and [Lu((DO3A-pic-NO<sub>2</sub>))] (30 nmol, 1 equiv.) in 25 mM NH<sub>4</sub>HCO<sub>3</sub> buffer at pH 7.5 (700 μL). The resulting solution was left on a shaker at r.t. overnight. The title compound was isolated from the crude reaction mixture by HPLC purification and identified by HR-ESI-MS. HR-ESI-MS: [M+2H]<sup>+</sup> = calc. m/z 1410.4571, found: m/z 1410.4571. HPLC (Method C): R<sub>t</sub> = 7.25 min.

### Synthesis of [Y(DO3A-pic-SR<sub>2</sub>)]<sup>-</sup>

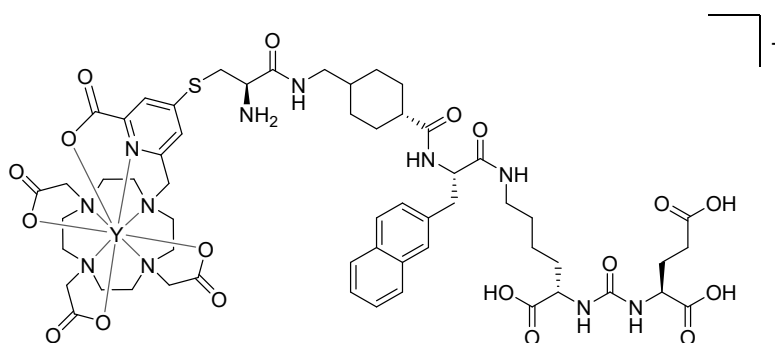

(((1S)-5-((2S)-2-(4-(((R)-2-amino-3-mercaptopropanamido)methyl)cyclohexane-1-carboxamido)-3-(naphthalen-2-yl)propanamido)-1-carboxypentyl)carbamoyl)-L-glutamic acid (300 nmol, 5 equiv.) was added to a solution of TCEP·HCl (375 nmol, 6.25 equiv.) and [Y(DO3A-pic-NO<sub>2</sub>)] (60 nmol, 1 equiv.) in 25 mM NH<sub>4</sub>HCO<sub>3</sub> buffer at pH 7.5 (317 μL). The resulting solution was incubated at r.t. overnight. The title compound was isolated from the crude reaction mixture by HPLC purification and identified by HR-ESI-MS. HR-ESI-MS: [M+3H]<sup>2+</sup> = calc. m/z 662.7135, found: m/z 662.7147. HPLC (Method C): R<sub>t</sub> = 7.27 min.



### Conjugation of [La(DO3Apic-NO<sub>2</sub>)]<sup>-</sup> to BSA

To a solution of [La(DO3Apic-NO<sub>2</sub>)]<sup>-</sup> (166 nmol, 100 equiv.) in (NH<sub>4</sub>)(HCO<sub>3</sub>) buffer (52 μL, 25 mM, pH = 7.4) was added a solution of BSA (1.66 nmol, 1 equiv.) in (NH<sub>4</sub>)(HCO<sub>3</sub>) buffer (40 μL, 25 mM, pH = 7.4). The resulting solution was incubated at 37°C for 21 h. The solution was desalted using a Zeba<sup>®</sup> size exclusion Spin Desalting column and analyzed by MALDI-TOF MS, revealing a signal at 67072 m/z, compared to the signal of unmodified BSA at 66639 m/z, corresponding to the conjugation of a single Lanthanum complex to BSA.

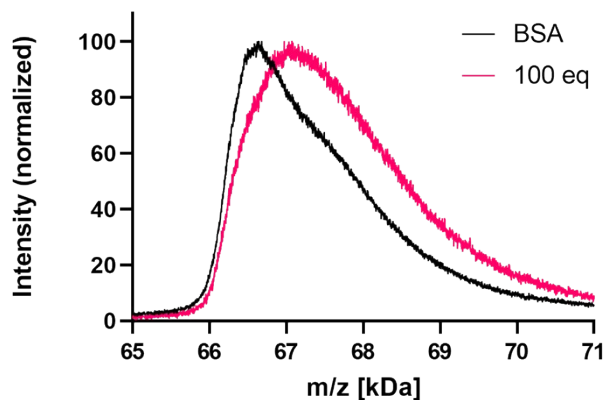

**Figure S4:** MALDI-TOF MS signals of unmodified BSA (black) and BSA reacted with 100 equivalents of [La(DO3Apic-NO<sub>2</sub>)]<sup>-</sup> (red), indicating the conjugation of BSA to a single Lanthanum complex.

## 4. Kinetic Studies

### UV/Vis measurements

Kinetic measurements were carried out following the characteristic shift in UV absorbance from 300 nm to 280 nm as reported in literature.<sup>2</sup> The device was blanked with the corresponding metal complex (30 nmol, 1 equiv.) in 25 mM  $\text{NH}_4\text{HCO}_3$  buffer at pH 7.5 in a total volume of 694.5  $\mu\text{L}$ . Ethyl thioglycolate (30 nmol in 4.5  $\mu\text{L}$  buffer, 1 equiv.) was added and the reaction progress was monitored every 5 min for a total of 18 h (or 6 h in the case of Sc). The procedure was identical in the case of **DO3A-pic-NO<sub>2</sub>**. Curve fits were carried out using exponential decay considering pseudo first order kinetics with GraphPad Prism 9.4.1. Data acquisition was conducted until the reaction produced plateau absorbance for at least 100 minutes.

**Table S1:** Table summarizing rate constants and half-lives of the conjugation reaction.

| M  | k [h <sup>-1</sup> ] | t <sub>1/2</sub> [h] |
|----|----------------------|----------------------|
| ∅  | 0.33 ± 0.01          | 3.0 ± 0.06           |
| La | 0.18 ± 0.01          | 5.5 ± 0.06           |
| Tb | 0.25 ± 0.01          | 4.0 ± 0.08           |
| Eu | 0.31 ± 0.01          | 3.2 ± 0.04           |
| Lu | 0.22 ± 0.01          | 4.5 ± 0.12           |
| Y  | 0.25 ± 0.01          | 4.0 ± 0.03           |
| Sc | 0.89 ± 0.03          | 1.1 ± 0.04           |

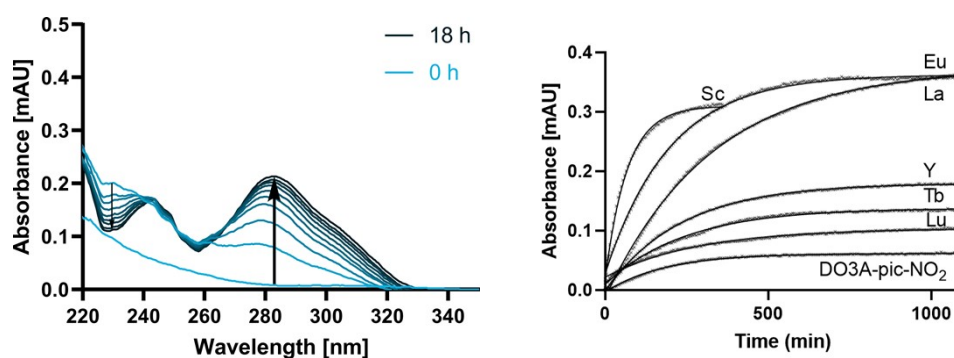

**Figure S5:** Characteristic shift in UV/Vis spectrum during the thioconjugation reaction, exemplified by the reaction from  $[\text{Y}(\text{DO3A-pic-NO}_2)]^-$  to  $[\text{Y}(\text{DO3A-pic-SR}_1)]^-$ . Kinetic data was obtained by monitoring the increased absorption at 280 nm (left). Kinetic measurements plotting shift in UV absorption at 280 nm versus time (right).

The identity of the  $[\text{RE}(\text{DO3A-pic-SR}_1)]^-$  complexes was additionally verified by HR-ESI-MS:

**[La(DO3A-pic-SR<sub>1</sub>)]<sup>-</sup>:** HR-ESI-MS:  $[\text{M}+2\text{H}]^+ = \text{calc. } m/z 736.1157, \text{ found: } m/z 736.1164$

HPLC (Method C):  $R_t = 5.52$  min.

**[Tb(DO3A-pic-SR<sub>1</sub>)]<sup>-</sup>:** HR-ESI-MS:  $[\text{M}+2\text{H}]^+ = \text{calc. } m/z 756.1347, \text{ found: } m/z 756.1349$

HPLC (Method C):  $R_t = 5.40$  min.

**[Eu(DO3A-pic-SR<sub>1</sub>)]<sup>-</sup>:** HR-ESI-MS:  $[\text{M}+2\text{H}]^+ = \text{calc. } m/z 750.1306, \text{ found: } m/z 750.1305$

HPLC (Method C):  $R_t = 5.42$  min.

**[Lu(DO3A-pic-SR<sub>1</sub>)]<sup>-</sup>:** HR-ESI-MS:  $[\text{M}+2\text{H}]^+ = \text{calc. } m/z 772.1501, \text{ found: } m/z 772.1499$

HPLC (Method C):  $R_t = 5.42$  min.

**[Y(DO3A-pic-SR<sub>1</sub>)]<sup>-</sup>:** HR-ESI-MS:  $[\text{M}+2\text{H}]^+ = \text{calc. } m/z 686.1152, \text{ found: } m/z 686.1152$

HPLC (Method C):  $R_t = 5.50$  min.

DO3A-pic-SR<sub>1</sub>: HR-ESI-MS: [M+H]<sup>+</sup> = calc. m/z 600.2334, found: m/z 600.2330

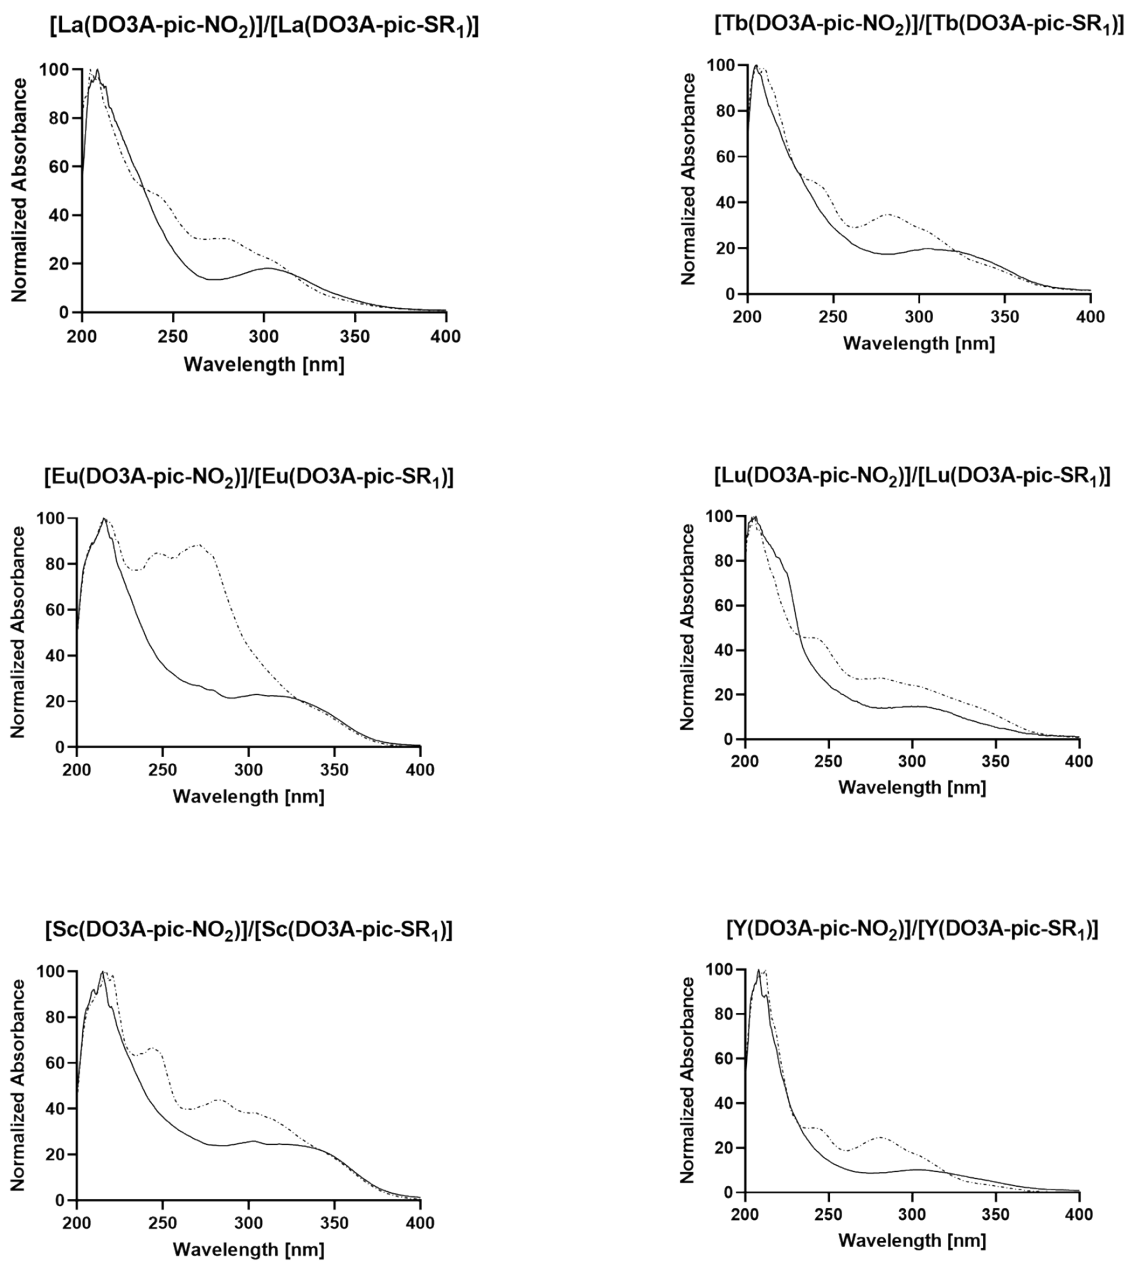

Figure S6: UV/Vis spectra of the investigated [RE((DO3A-pic-NO<sub>2</sub>))] complexes overlaid with their corresponding [RE((DO3A-pic-SR<sub>1</sub>))] complexes.

## Luminescence turn-on measurements

Luminescence turn-on measurements were carried out according to the same procedure as UV/Vis measurements. The change in intensity of luminescence emission was monitored for 493, 548, 589, and 625 nm. The k-value was averaged over all observed wavelengths.

In brief, Lifetime values were extracted by fitting the luminescent decay curves with the equation:

$$I_t = I_0 * \exp\left(-\frac{x}{\tau}\right) \quad (\text{S1})$$

where  $I_t$  is the initial luminescent emission intensity,  $I_0$  is the intensity at time  $x = 0$ , and  $\tau$  is the luminescence lifetime. Data was fit using Prism.  $q$  was calculated using Horrocks' method, eq. S2.

$$q = 5.0 \left( \frac{1}{\tau(H_2O)} - \frac{1}{\tau(D_2O)} - 0.06 \right) \quad (\text{S2})$$

**Table S2:** Photophysical properties of  $[\text{Tb}(\text{DO3A-pic-NO}_2)]^-$  and  $[\text{Tb}(\text{DO3A-pic-SR}_1)]^-$ .  $q$  = inner-sphere hydration.<sup>3</sup>  $\Phi$  determined using reference compound  $[\text{Tb}(\text{DO3A-pic})]^-$ .<sup>4</sup>

|                            | $[\text{Tb}(\text{DO3A-pic-NO}_2)]^-$ | $[\text{Tb}(\text{DO3A-pic-SR}_1)]^-$ |
|----------------------------|---------------------------------------|---------------------------------------|
| $\lambda_{\text{ex}}$ [nm] | 304                                   | 280                                   |
| $q$                        | 0                                     | 0                                     |
| $\Phi$ [%]                 | 4.7                                   | 41                                    |

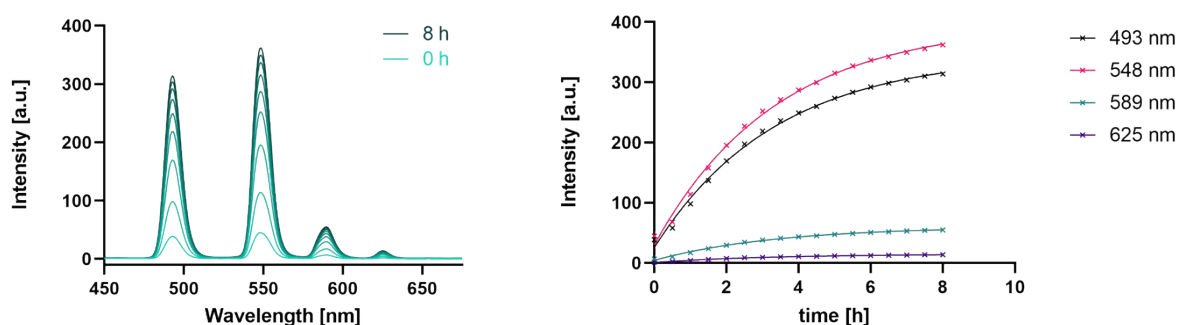

**Figure S7:** Left: Luminescence turn-on during the thioconjugation reaction from  $[\text{Tb}(\text{DO3A-pic-NO}_2)]^-$  to  $[\text{Tb}(\text{DO3A-pic-SEtCOOEt})]^-$ . Upon conjugation, increased emission from the characteristic Tb emission bands at 493, 548, 589, and 625 nm is observed. Right: Luminescence turn-on kinetics of  $[\text{Tb}(\text{DO3A-pic-NO}_2)]^-$  upon thioether formation. Conditions: To  $[\text{Tb}(\text{DO3A-pic-NO}_2)]^-$  (30 nmol, 1 equiv.) in 25 mM  $\text{NH}_4\text{HCO}_3$  buffer at pH 7.5 in a total volume of 694.5  $\mu\text{L}$  was added HSR<sub>1</sub> (30 nmol in 4.5  $\mu\text{L}$  buffer, 1 equiv.) and the reaction progress was monitored every 30 min for a total of 8 h. Excitation wavelength = 282 nm.

## 5. Radiochemistry

Lutetium-177 was received from the University of Missouri through the Department of Energy Isotope Program, in the form of a  $^{177}\text{LuCl}_3$  solution (pH 2). Yttrium-86 was received from the Engle Group at the University of Wisconsin-Madison, in the form of an  $^{86}\text{YCl}_3$  solution (pH 2).

Radiolabelling experiments were carried out in triplicate at  $80^\circ\text{C}$  with various amounts of chelator (10 nmol, 2.5 nmol, 1 nmol, 0.25 nmol, 0.1 nmol) in 0.25 M  $\text{NH}_4\text{OAc}$  buffer at pH = 5.5 and 30-32  $\mu\text{Ci}$  of  $^{177}\text{Lu}/24-32 \mu\text{Ci}$  of  $^{86}\text{Y}$  in a total amount of 116  $\mu\text{L}$  solution.

### Apparent Molar Activity

The time-dependent complexation yield for each radioisotope/ligand ratio and the DTPA challenge stability were determined by radio thin-layer chromatography (radio-TLC) using aluminium-backed normal-phase (silica) TLC plates as the stationary phase and 0.15 M  $\text{NH}_4\text{OAc}/10 \text{ mM EDTA}$  pH 5.0 mixed 1:1 with MeOH as the mobile phase. Under these conditions, free radiometals move with the solvent front ( $R_f = 0.5-1.0$ ) and complexed radioisotope remains at  $R_f = 0.1-0.5$ . Radioactivity distribution on TLC plates was visualized on photo plates with an Amersham Biosciences Typhoon 9400 Variable Mode Imager and quantified using ImageQuant 5.2 software.

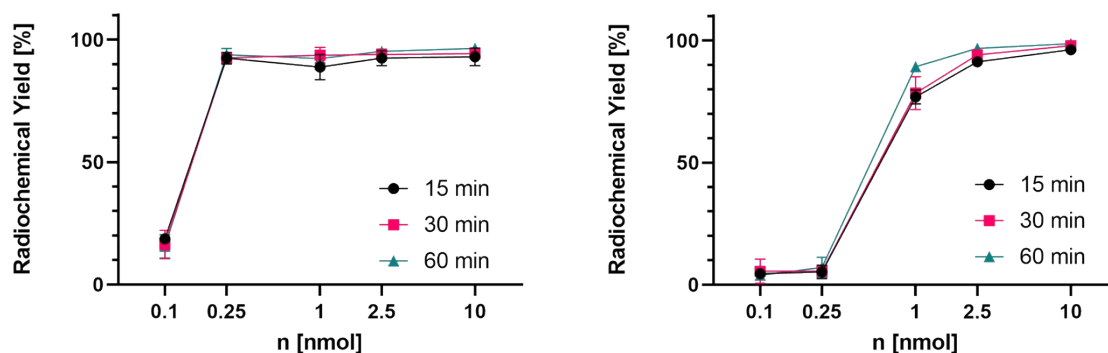

**Figure S8:** Radiolabelling (triplicate) of  $^{177}\text{Lu}[\text{Lu}(\text{DO3A-pic-NO}_2)]^-$  (left) and  $^{86}\text{Y}[\text{Y}(\text{DO3A-pic-NO}_2)]^-$  (right) at various ligand concentrations and time points. Conditions:  $80^\circ\text{C}$ , pH 5.5, 30-32  $\mu\text{Ci}$   $^{177}\text{Lu}/24-32 \mu\text{Ci}$   $^{86}\text{Y}$  per sample, 116  $\mu\text{L}$  total volume per sample.

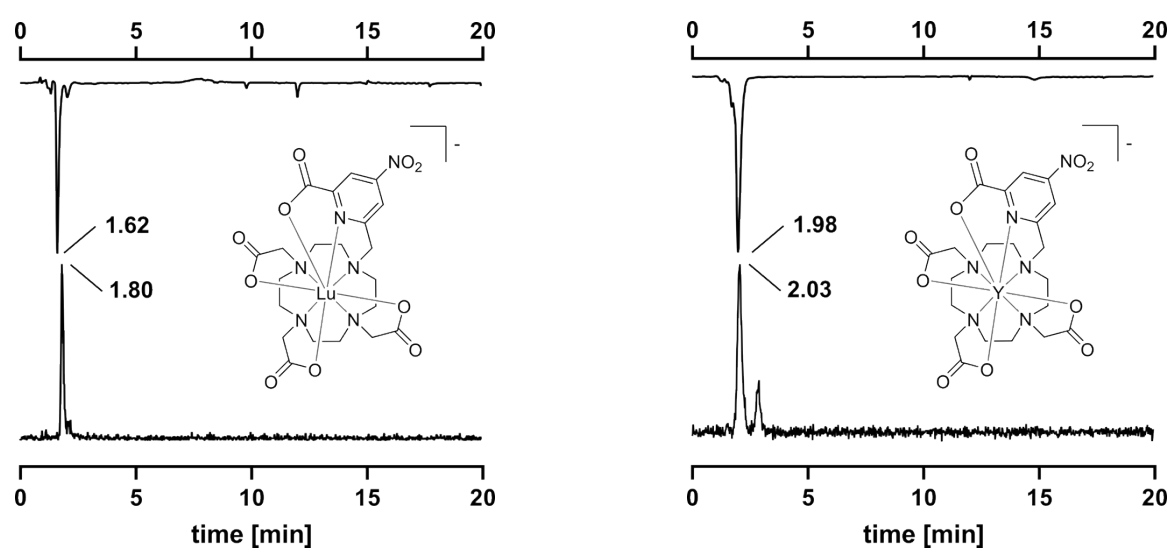

**Figure S9:** Coinjection of  $^{177}\text{Lu}[\text{Lu}(\text{DO3A-pic-NO}_2)]^-$  with its  $^{\text{nat}}\text{Lu}$  homologue (left) and of  $^{86}\text{Y}[\text{Y}(\text{DO3A-pic-NO}_2)]^-$  and its  $^{\text{nat}}\text{Y}$  homologue (right). UV trace inverted on top and  $\gamma$ -trace at the bottom.

The signal at 2.93 min is assumed to be a protonation or conformation isomer of the same compound, as it disappears later. Furthermore, collection and reinjection of the first peak again delivers two signals.

### DTPA Challenge

$^{177}\text{Lu}$ : Following radiolabelling, a 10 mM DTPA/0.25 M  $\text{NH}_4\text{OAc}$  solution at pH 5.5 (10  $\mu\text{L}$ ) was added to conjugates in solution (50  $\mu\text{L}$ , 1.04 nmol ligand,  $n = 3$ ). The final ligand/DTPA molar ratio was 1:300. The resulting solutions were incubated at room temperature for 0.25–24 h. A total of 2  $\mu\text{L}$  was removed at each time point and spotted onto a TLC strip.

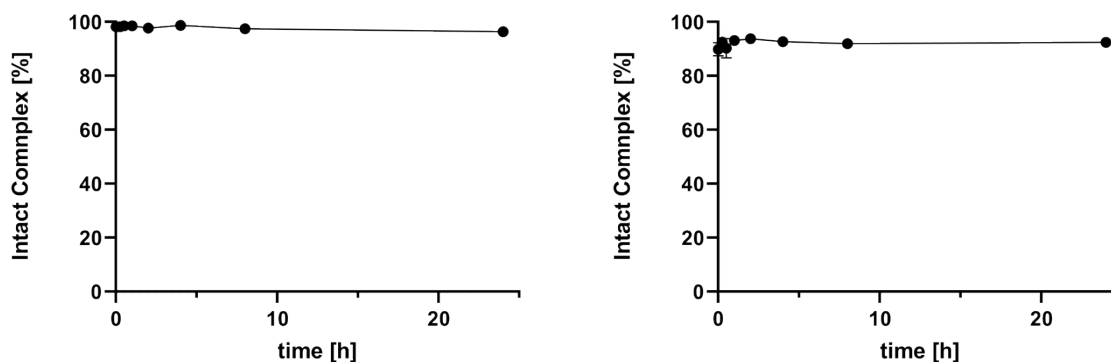

**Figure S10:** DTPA challenge experiments (triplicate) of  $^{177}\text{Lu}[\text{Lu}(\text{DO3A-pic-NO}_2)]^-$  and  $^{177}\text{Lu}[\text{Lu}(\text{DO3A-pic-SR}_1)]^-$  over time.

$^{86}\text{Y}$ : Following radiolabelling, a 10 mM DTPA/0.25 M  $\text{NH}_4\text{OAc}$  solution at pH 5.5 (10  $\mu\text{L}$ ) was added to conjugates in solution  $^{86}\text{Y}[\text{Y}(\text{DO3A-pic-NO}_2)]^-$  (0.33 nmol in 36  $\mu\text{L}$ ,  $n = 3$ ). The final ligand/DTPA molar ratio was 1:300. The resulting solutions were incubated at room temperature for 0.25–24 h. A total of 2  $\mu\text{L}$  was removed at each time point and spotted onto a TLC strip.

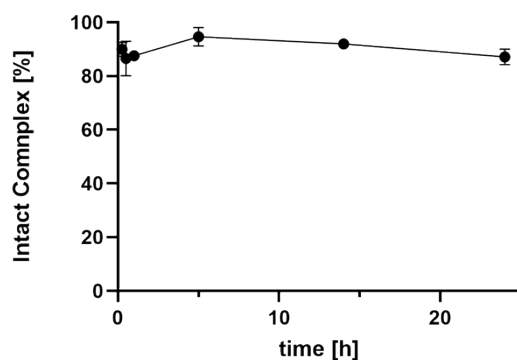

**Figure S11:** DTPA challenge experiment (triplicate) of  $^{86}\text{Y}[\text{Y}(\text{DO3A-pic-NO}_2)]^-$  over time.

## Thioconjugation experiments using radioactive species

$^{177}\text{Lu}$ : To  $[^{177}\text{Lu}][\text{Lu}(\text{DO3A-pic-NO}_2)]^-$  was added 0.5 M  $\text{NH}_4\text{HCO}_3$  solution at pH 7.5 (50  $\mu\text{L}$ ) and the corresponding thiole (30 eq, 4.5  $\mu\text{L}$  25 mM  $\text{NH}_4\text{HCO}_3$  solution at pH 7.5). In the case of peptide conjugation, 37.5 eq. TCEP was added to avoid disulfide formation. The resulting solution was incubated at 37°C. Reaction progress was monitored by radio HPLC.

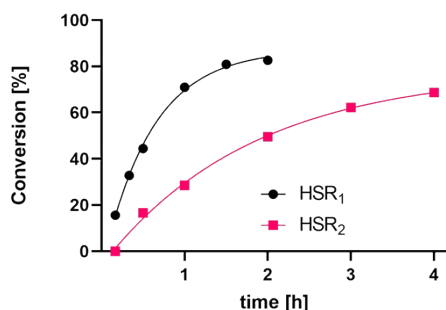

**Figure S12:** Reaction progress of the thioconjugation between  $[^{177}\text{Lu}][\text{Lu}(\text{DO3A-pic-NO}_2)]^-$  and different thioles over time. Conversion is based on integrated signals of the radiotrace.

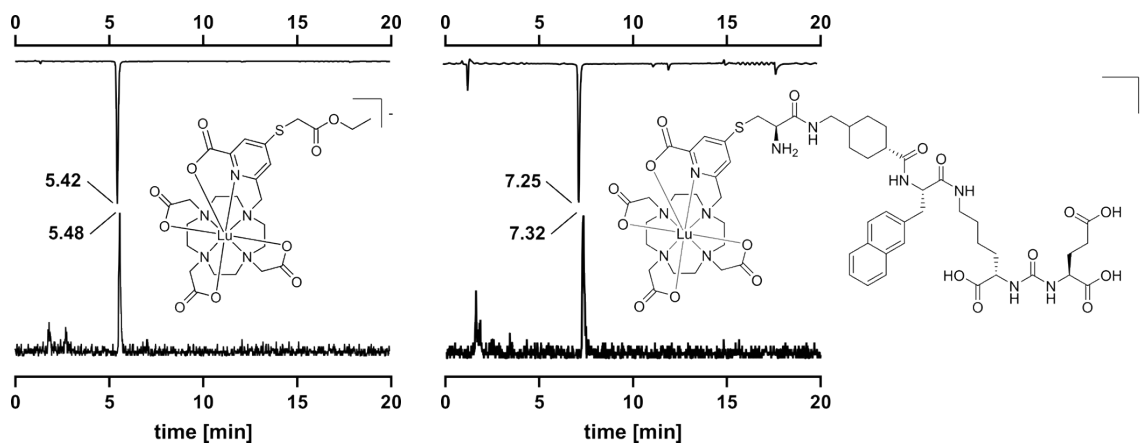

**Figure S13:** Coinjections of  $[^{177}\text{Lu}][\text{Lu}(\text{DO3A-pic-SEtCOEt})]^-$  (left) and  $[^{177}\text{Lu}][\text{Lu}(\text{DO3A-pic-S-Cys-PSMA})]^-$  (right) with their  $^{nat}\text{Lu}$  homologues. UV trace inverted on top and  $\gamma$ -trace at the bottom.

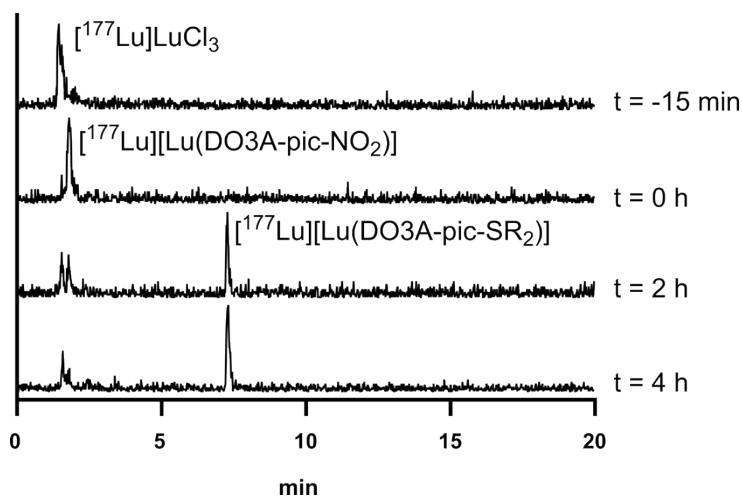

**Figure S14:** RadioHPLC monitoring of the reaction progress from the radiolabeling of  $\text{DO3A-pic-NO}_2$  ( $t = -15$  min to  $t = 0$  h) to the formation of  $[^{177}\text{Lu}][\text{Lu}(\text{DO3A-pic-S-Cys-PSMA})]^-$  at  $t = 4$  h (normalized).

$^{86}\text{Y}$ : To  $[^{86}\text{Y}][\text{Y}(\text{DO3A-pic-NO}_2)]^-$  (5 nmol, pH 5.5) was added 0.5 M  $\text{NH}_4\text{HCO}_3$  solution at pH 7.5 (50  $\mu\text{L}$ ) and  $\text{HSR}_2$  (5 eq, 14.4  $\mu\text{L}$  1.75 mM aqueous solution). 37.5 eq. TCEP (25 nmol, 5 eq, 1 mM in 25 mM  $\text{NH}_4\text{HCO}_3$  solution at pH 7.5) was added to avoid disulfide formation. The resulting solution was incubated at 37°C. Reaction progress was monitored by radio HPLC.

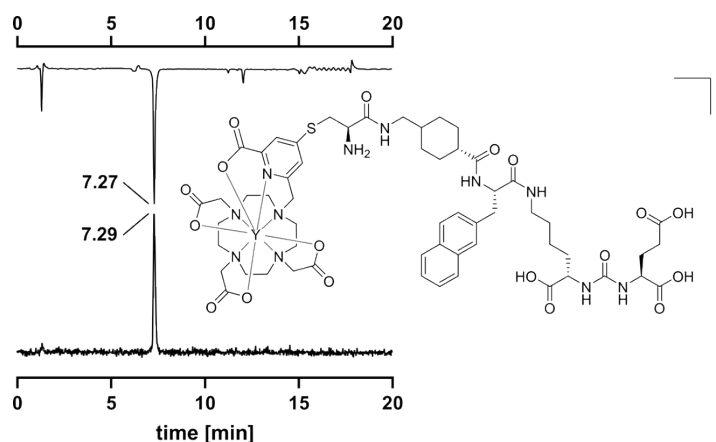

**Figure S15:** Coinjection of  $[^{86}\text{Y}][\text{Y}(\text{DO3A-pic-SR}_2)]^-$  with its  $^{nat}\text{Y}$  homologue. UV trace inverted on top and  $\gamma$ -trace at the bottom.

### CRET Plate imaging

An amount of 17-18  $\mu\text{Ci}$  of  $[^{177}\text{Lu}][\text{Lu}(\text{DO3A-pic-NO}_2)]^-$  in 8  $\mu\text{L}$  (taken directly from the coupling reaction) was added to various amounts of  $[\text{Tb}(\text{DO3A-pic-NO}_2)]^-$  and  $[\text{Tb}(\text{DO3A-pic-SEtCOOEt})]^-$  in 200  $\mu\text{L}$  of 25 mM  $\text{NH}_4\text{HCO}_3$  solution at pH 7.5. The resulting solutions were imaged on an IVIS Lumina Series III from Caliper LifeSciences small animal imager. Scans were collected over 5 minutes with blocked excitation and open emission filter.

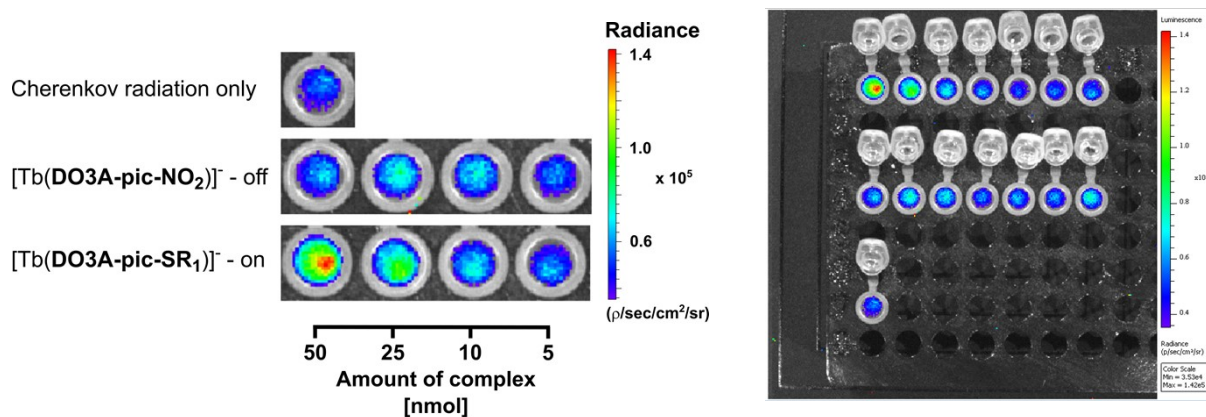

17-18  $\mu\text{Ci}$  of  $[^{177}\text{Lu}][\text{Lu}(\text{DO3A-pic-SR}_1)]^-$  in every well

**Figure S16:** Cherenkov radiation mediated energy transfer (CRET) based luminescence of  $[\text{Tb}(\text{DO3A-pic-NO}_2)]^-$  and  $[\text{Tb}(\text{DO3A-pic-SEtCOOEt})]^-$ , each well including the blank contains 17-18  $\mu\text{Ci}$   $^{177}\text{Lu}$ . A blank sample of  $[^{177}\text{Lu}][\text{Lu}(\text{DO3A-pic-SEtCOOEt})]^-$  provides a pure Cherenkov radiation sample without any luminescence contribution from Tb. Post-thioconjugation improves the QY 10-fold resulting in an increase in radiance from the “off” ( $\text{NO}_2$ ) to “on” ( $\text{SR}_1$ ) complexes (left). Full (uncropped) CRET plate image recorded.  $[\text{Tb}(\text{DO3A-pic-SEtCOOEt})]^-$  is in the first row,  $[\text{Tb}(\text{DO3A-pic-NO}_2)]^-$  is in the second row, and the blank is in the third row. All wells contain 17-18  $\mu\text{Ci}$   $[^{177}\text{Lu}][\text{Lu}(\text{DO3A-pic-S-SEtCOOEt})]^-$ . The concentration gradient from left to right is 50, 25, 10, 5, 2, 1, AND 0.1 nmol (right).



## 6. In vivo studies

All animal experiments and procedures were performed in accordance with the United States' National Institutes of Health's "Guide for the Care and Use of Laboratory Animals" and approved by Institutional Animal Care and Use Committee (IACUC) at Stony Brook Medicine under protocol number 1104609, entitled "Animal Models for the Targeted Molecular Imaging and Therapy of Cancer using Radioactive and Fluorescent Agents", expiration 7/20/2023.

### PET imaging

Eight-week-old male NCru mice were inoculated subcutaneously on the right shoulder with PSMA (+) PC3 PIP cells (expression of PSMA) in 1:1 DPBS pH 7.4: Matrigel or on the left shoulder with PSMA (-) PC3 flu cells (no expression of PSMA) in 1:1 DPBS pH 7.4 : Matrigel. At day 10 post-xenograft when tumours reached a suitable size, animals were administered [ $^{86}\text{Y}$ ][Y(DO3A-pic-S-Cys-PSMA)] (10-40  $\mu\text{Ci}$  in DPBS) via tail-vein injection. Mice were imaged at 90 min post injection (p.i.) using Siemens Inveon PET/ CT Multimodality System, and image analysis was conducted using AMIDE.

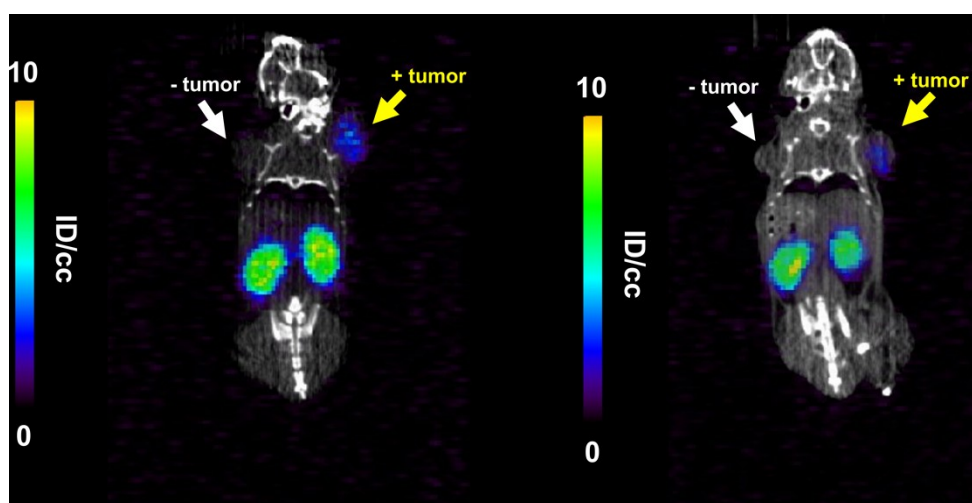

**Figure S17:** PET scan (top view) of mice injected with [ $^{86}\text{Y}$ ][Y(DO3A-pic-S-Cys-PSMA)] 90 min post-injection. The PSMA positive tumours are indicated with an arrow.

## Biodistribution

The 10 male NCru athymic nude mice were anesthetized with isoflurane, and 12-18  $\mu\text{Ci}$  of  $[^{86}\text{Y}][\text{Y}(\text{DO3A-pic-NO}_2)]^-$  or 10-40  $\mu\text{Ci}$  of  $[^{86}\text{Y}][\text{Y}(\text{DO3A-pic-S-Cys-PSMA})]^-$  was intravenously injected via tail-vein catheter. Mice were sacrificed at 2 h post-injection, and select organs were harvested. Radioactivity was counted by using a gamma counter, and the radioactivity associated with each organ was expressed as %ID/g. Biodistribution data were assessed by unpaired t tests using GraphPad Prism to determine if differences between groups were statistically significant ( $p < 0.05$ ).

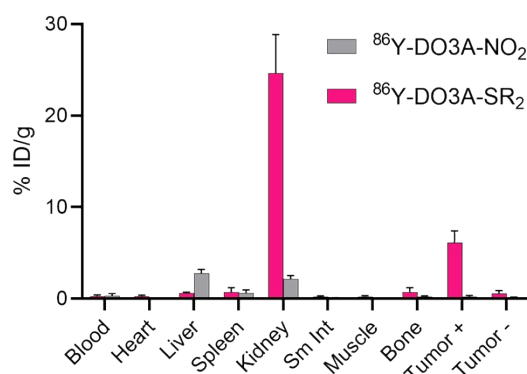

**Figure S18:** Bar chart of 2 h biodistribution of  $[^{86}\text{Y}][\text{Y}(\text{DO3A-pic-SR}_2)]^-$  ( $n = 5$ ) and  $[^{86}\text{Y}][\text{Y}(\text{DO3A-pic-NO}_2)]^-$  ( $n = 5$ ).

**Table S3:** Numerical values of 2 h biodistribution of  $[^{86}\text{Y}][\text{Y}(\text{DO3A-pic-SR}_2)]^-$  ( $n = 5$ ).

| [%ID/g]         | $[^{86}\text{Y}][\text{Y}(\text{DO3A-pic-SR}_2)]^-$ |         |         |         |         | Mean   | Std. dev. |
|-----------------|-----------------------------------------------------|---------|---------|---------|---------|--------|-----------|
|                 | Mouse 1                                             | Mouse 2 | Mouse 3 | Mouse 4 | Mouse 5 |        |           |
| Blood           | 0.22                                                | 0.24    | 0.53    | 0.17    | 0.23    | 0.278  | 0.143     |
| Heart           | 0.18                                                | 0.22    | 0.50    | 0.18    | 0.22    | 0.260  | 0.136     |
| Liver           | 0.63                                                | 0.55    | 0.72    | 0.66    | 0.46    | 0.604  | 0.101     |
| Spleen          | 0.50                                                | 0.35    | 1.59    | 0.48    | 0.68    | 0.720  | 0.500     |
| Kidney          | 23.04                                               | 22.14   | 31.71   | 25.20   | 21.08   | 24.634 | 4.236     |
| Small Intestine | 0.15                                                | 0.13    | 0.41    | 0.16    | 0.16    | 0.202  | 0.117     |
| Muscle          | 0.24                                                | 0.17    | 0.42    | 0.14    | 0.22    | 0.238  | 0.109     |
| Bone            | 0.53                                                | 0.41    | 1.53    | 0.42    | 0.79    | 0.736  | 0.470     |
| Tumor +         | 6.95                                                | 7.19    | 4.73    | 7.05    | 4.63    | 6.110  | 1.309     |
| Tumor -         | 0.57                                                | 1.07    | 0.62    | 0.27    | 0.23    | 0.552  | 0.338     |

**Table S4:** Numerical values of 2 h biodistribution of  $[^{86}\text{Y}][\text{Y}(\text{DO3A-pic-NO}_2)]^-$  ( $n = 5$ ).

| [%ID/g]         | $[^{86}\text{Y}][\text{Y}(\text{DO3A-pic-NO}_2)]^-$ |         |         |         |          | Mean  | Std. dev. |
|-----------------|-----------------------------------------------------|---------|---------|---------|----------|-------|-----------|
|                 | Mouse 6                                             | Mouse 7 | Mouse 8 | Mouse 9 | Mouse 10 |       |           |
| Blood           | 0.11                                                | 0.62    | 0.56    | 0.13    | 0.13     | 0.310 | 0.257     |
| Heart           | 0.08                                                | 0.08    | 0.09    | 0.09    | 0.07     | 0.082 | 0.008     |
| Liver           | 2.90                                                | 2.61    | 2.98    | 2.19    | 3.30     | 2.796 | 0.418     |
| Spleen          | 0.24                                                | 0.76    | 1.04    | 0.80    | 0.33     | 0.634 | 0.338     |
| Kidney          | 2.28                                                | 1.71    | 2.19    | 1.96    | 2.72     | 2.172 | 0.378     |
| Small Intestine | 0.05                                                | 0.06    | 0.06    | 0.10    | 0.11     | 0.076 | 0.027     |
| Muscle          | 0.03                                                | 0.06    | 0.07    | 0.06    | 0.06     | 0.056 | 0.015     |
| Bone            | 0.16                                                | 0.26    | 0.27    | 0.23    | 0.32     | 0.248 | 0.059     |
| Tumor +         | 0.16                                                | 0.37    | 0.36    | 0.00    | 0.15     | 0.208 | 0.157     |
| Tumor -         | 0.15                                                | 0.17    | 0.14    | 0.21    | 0.15     | 0.164 | 0.028     |

## Metabolite analysis

Urine was collected from mice 1, 5 (both injected with [ $^{86}\text{Y}$ ][Y(DO3A-pic-S-Cys-PSMA)] $^{-}$ ), and 7 (injected with [ $^{86}\text{Y}$ ][Y(DO3A-pic-NO $_2$ )] $^{-}$ ). The other animals did not have a sufficient quantity of urine. The collected urine was injected into an HPLC and fractions were collected for every 30 s. Radioactivity of measured with a gamma counter. Differences in the retention time of peaks are attributed to the severely decreased resolution of collecting fractions at 30 s intervals versus online detection on the HPLC- as well as the time difference between radiodetector and outlet for collection.

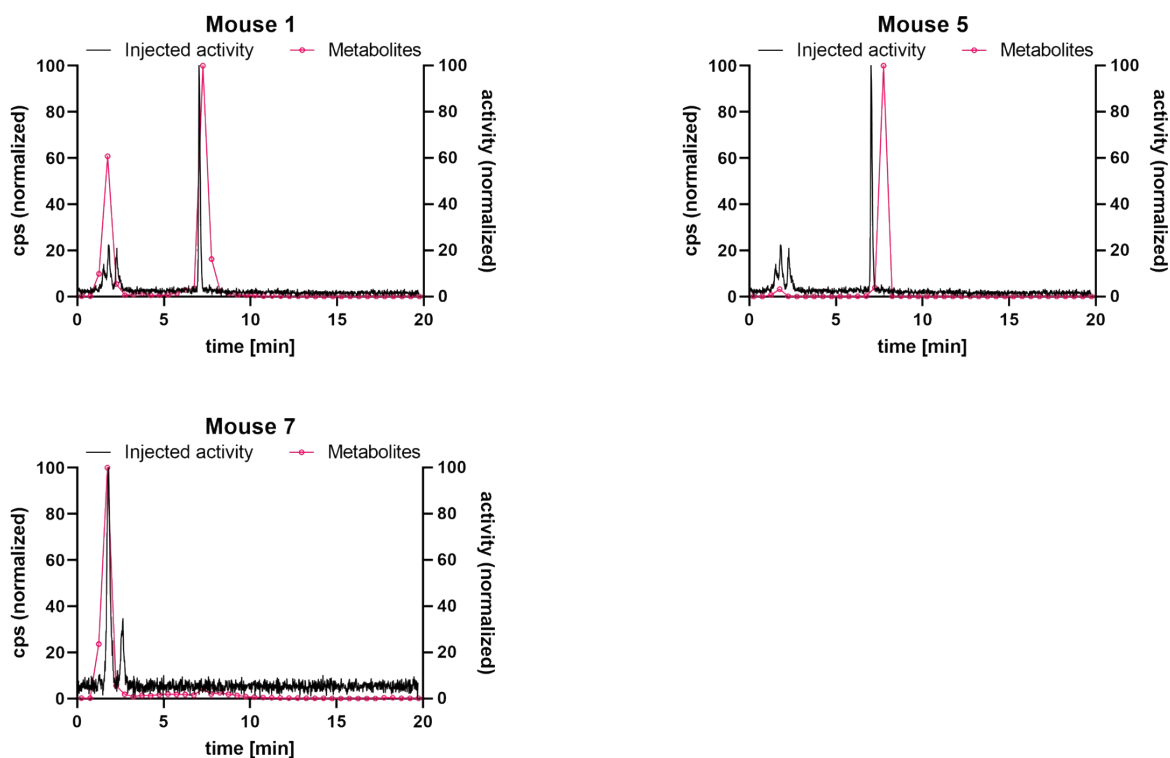

**Figure S19:** Metabolite analysis of the urine collected from 3 mice, showing the HPLC  $\gamma$ -trace of the injected compounds versus the activity measured from collected HPLC urine samples 2 h post-injection. Mice 1 & 5 were injected with [ $^{86}\text{Y}$ ][Y(DO3A-pic-S-Cys-PSMA)] $^{-}$ , mouse 7 was injected with [ $^{86}\text{Y}$ ][Y(DO3A-pic-NO $_2$ )] $^{-}$ .

## 7. Spectra

RAF-209, <sup>1</sup>H,  
CDC13, 19.05.2022

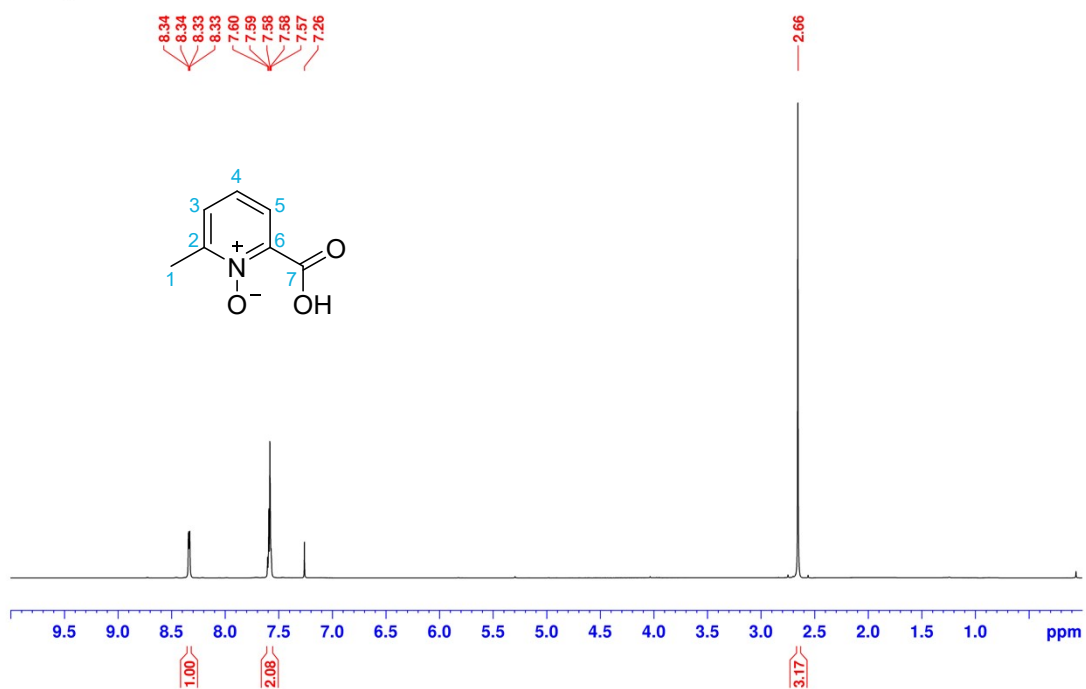

Figure S20: <sup>1</sup>H NMR of S1.

RAF-209, <sup>13</sup>C,  
CDC13, 19.05.2022

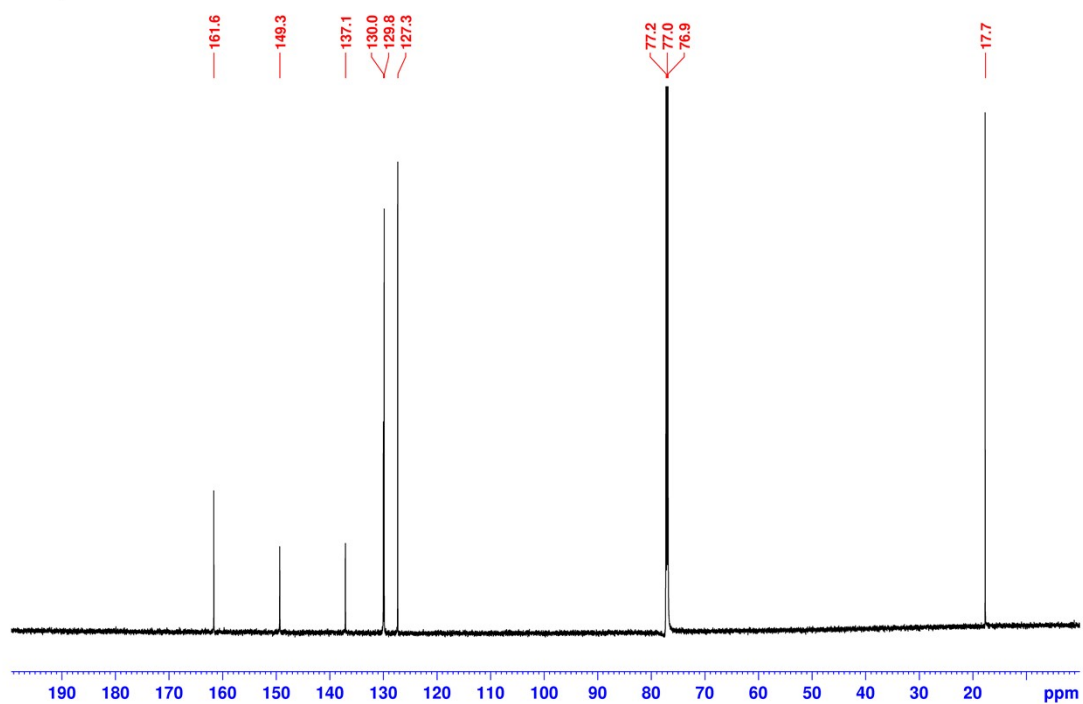

Figure S21: <sup>13</sup>C NMR of S1.

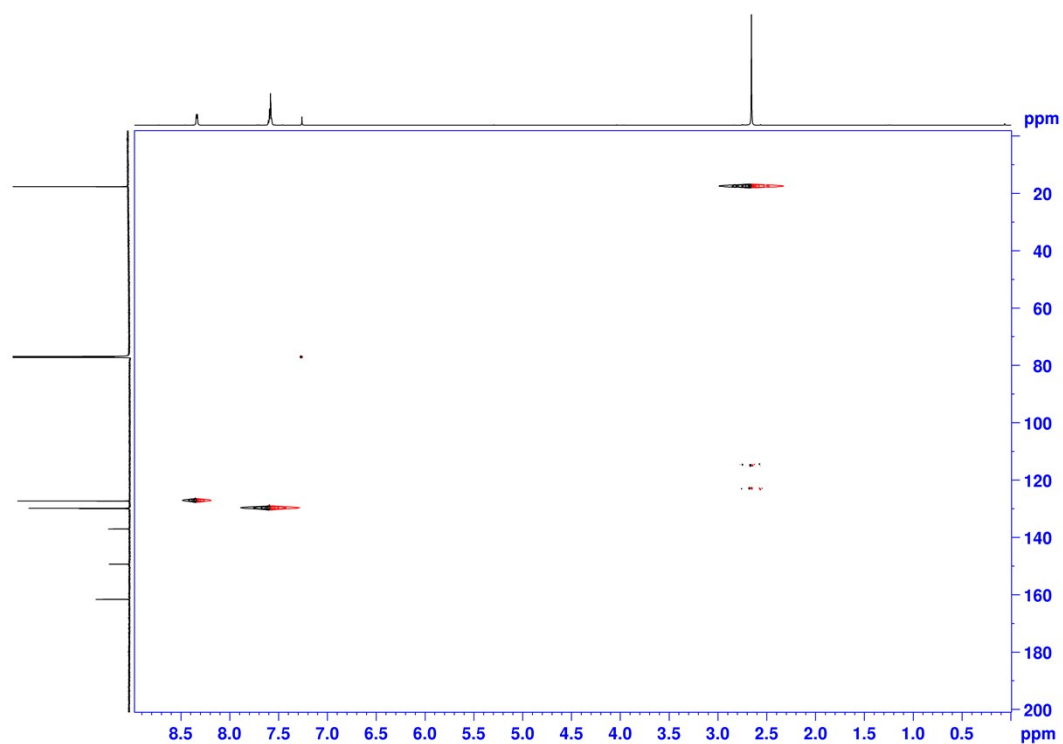

Figure S22: HSQC of S1.

RAF-209, HMBC,  
CDC13, 19.05.2022

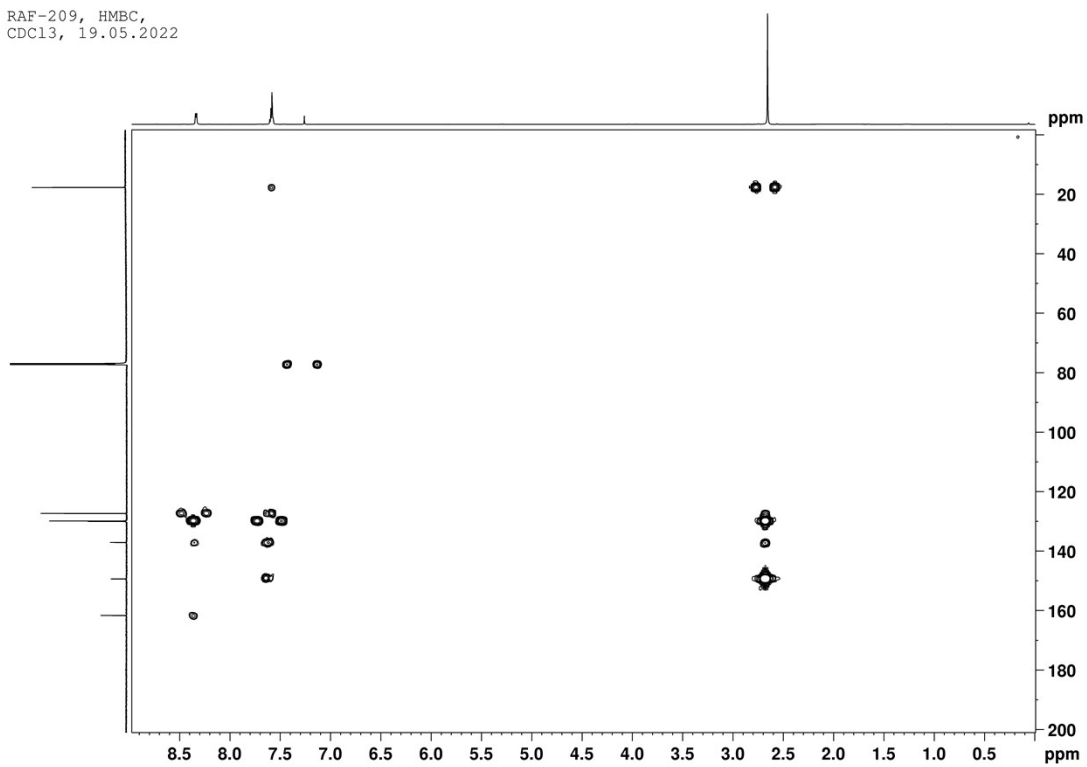

Figure S23: HMBC of S1.



RAF-212, 1H,  
CD3CN, 31.08.2022

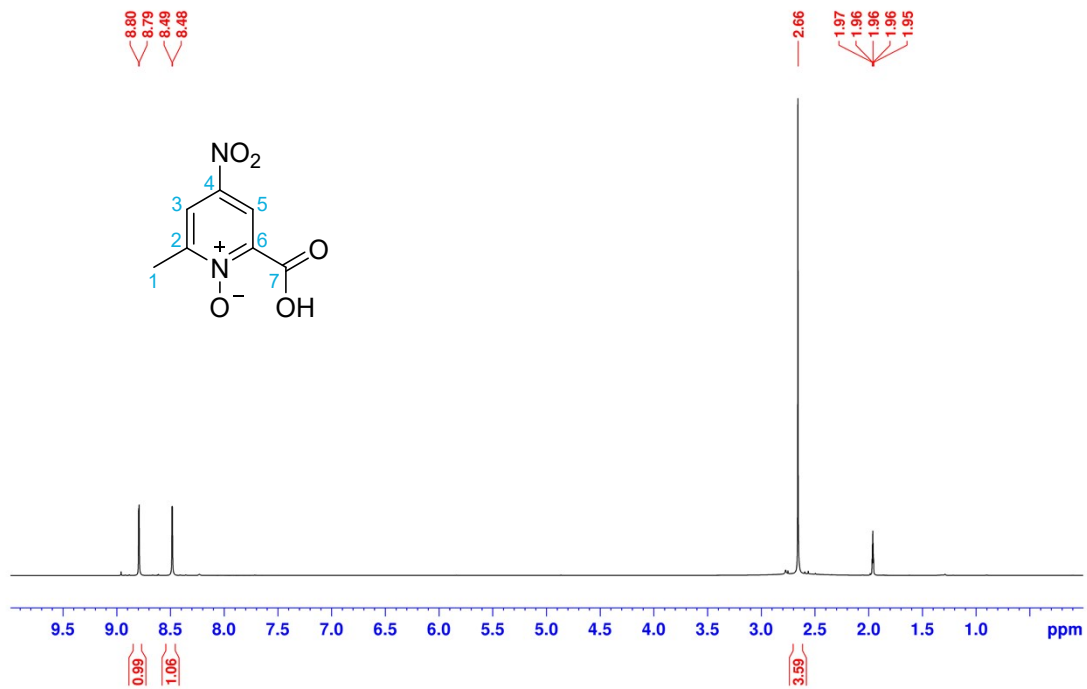

Figure S25: <sup>1</sup>H NMR of S2.

RAF-212, <sup>13</sup>C,  
CD<sub>3</sub>CN, 31.08.2022

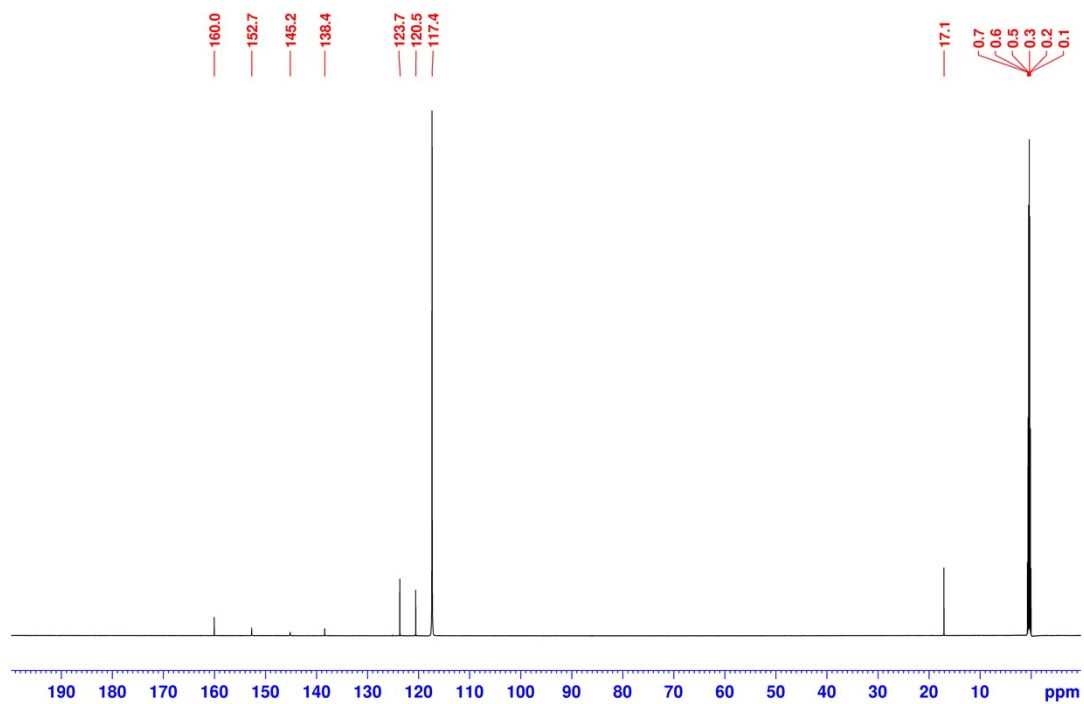

Figure S26: <sup>13</sup>C NMR of S2.

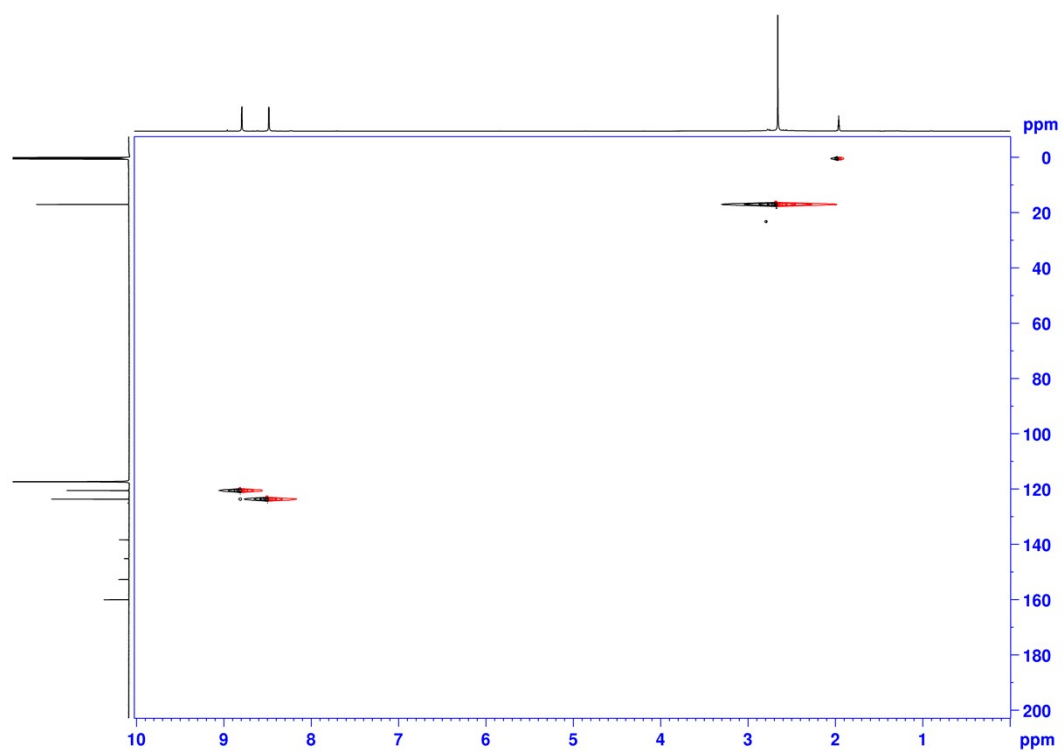

Figure S27: HSQC of S2.



RAF-212, HMBC,  
CD3CN, 01.09.2022

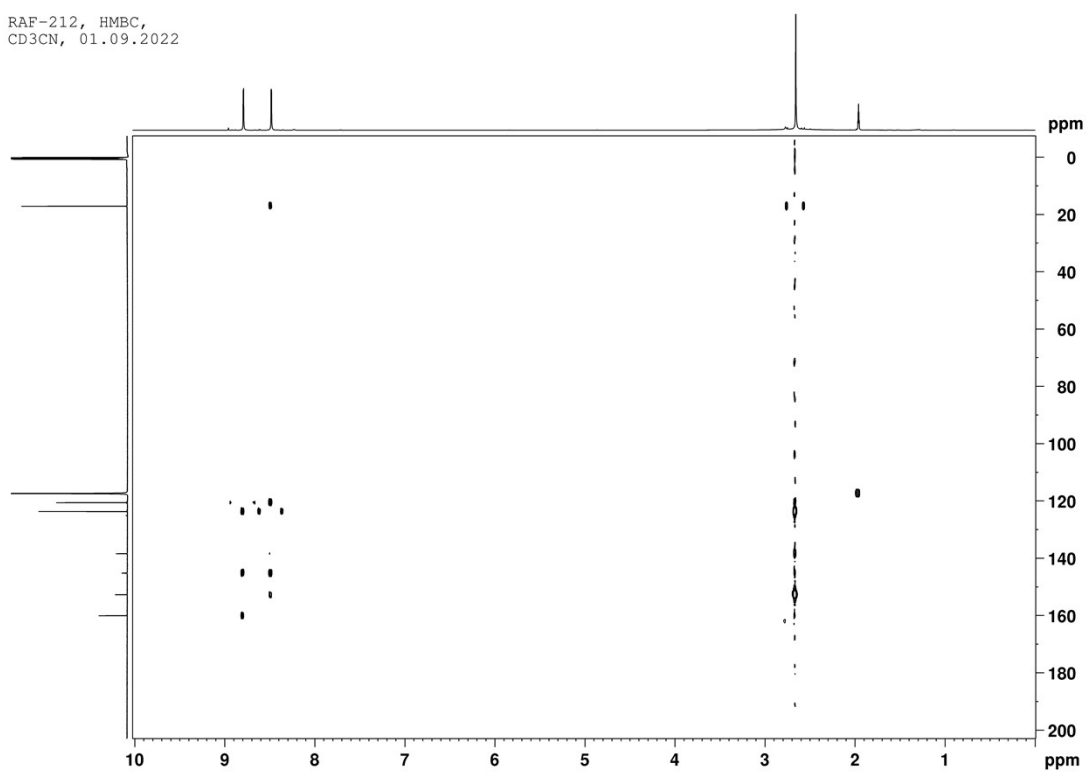

Figure S28: HMBC of S2.

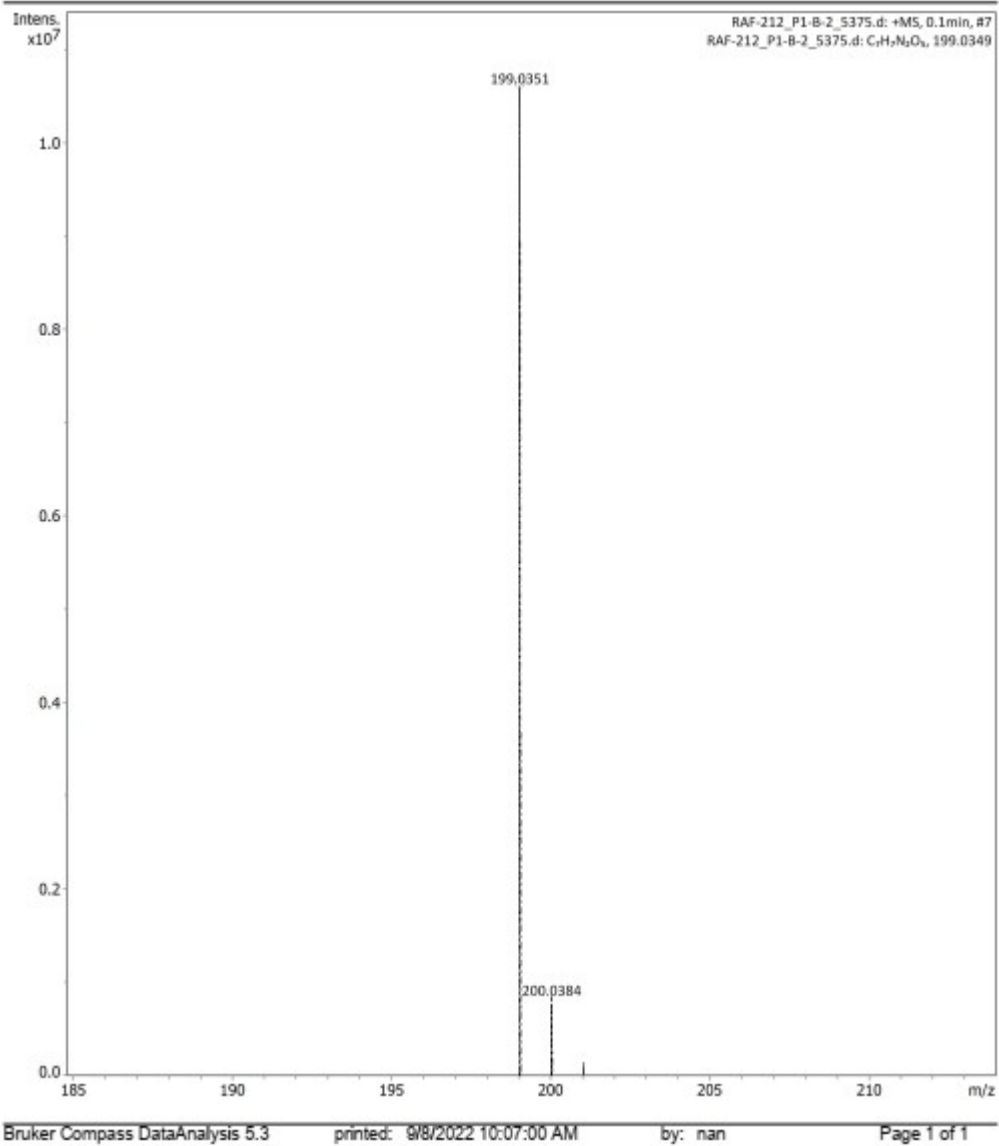

**Figure S29:** HR-ESI-MS of **S2**.

RAF-218, 1H,  
CDC13, 01.09.2022

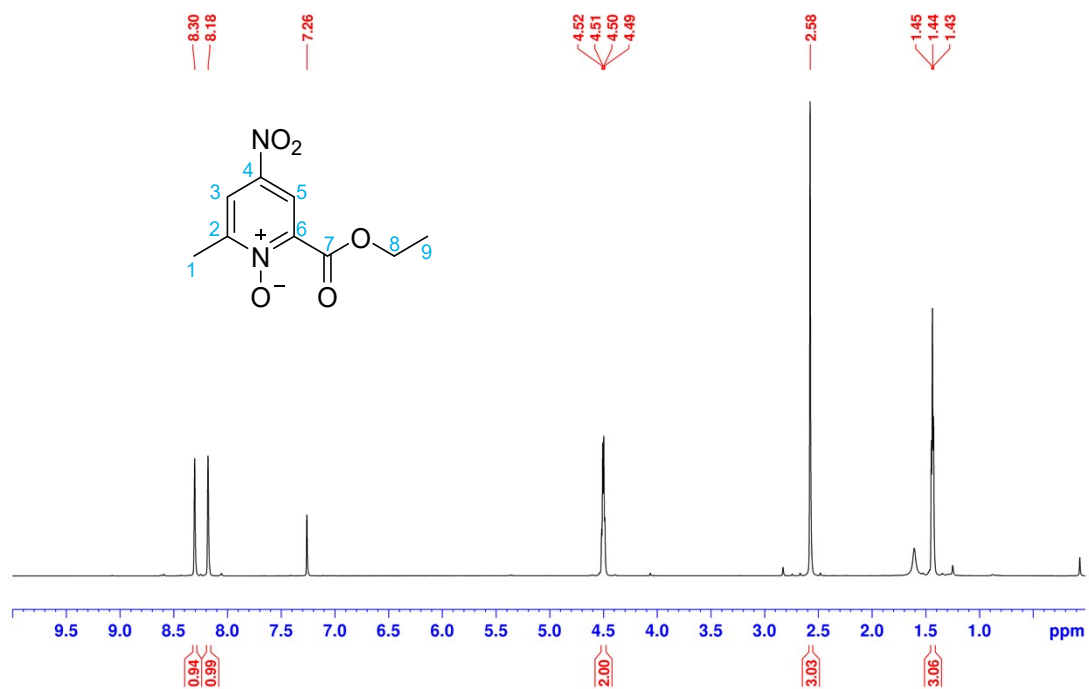

Figure S30: <sup>1</sup>H NMR of S3.

RAF-218, 13C,  
CDC13, 01.09.2022

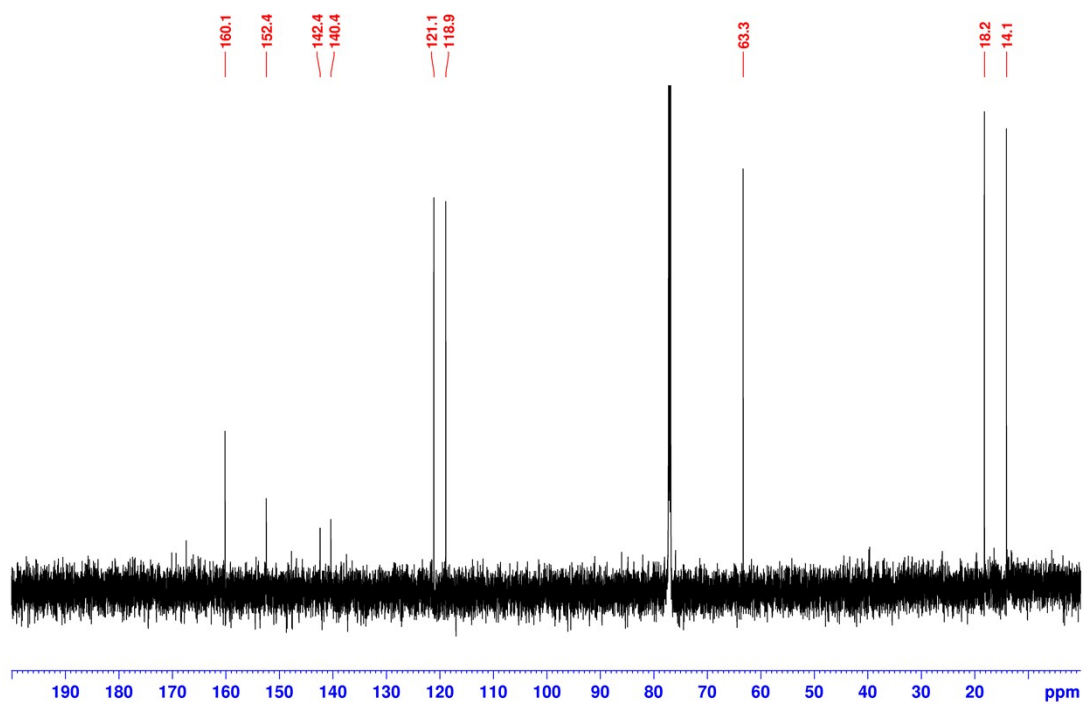

Figure S31: <sup>13</sup>C NMR of S3.

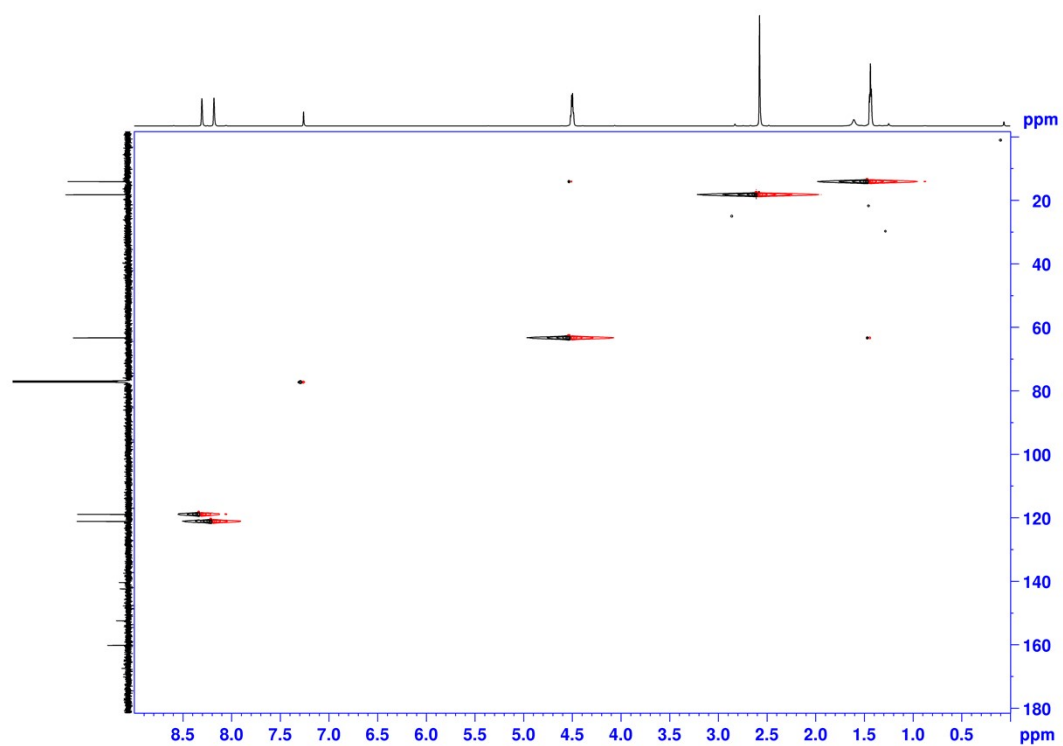

Figure S32: HSQC of S3.

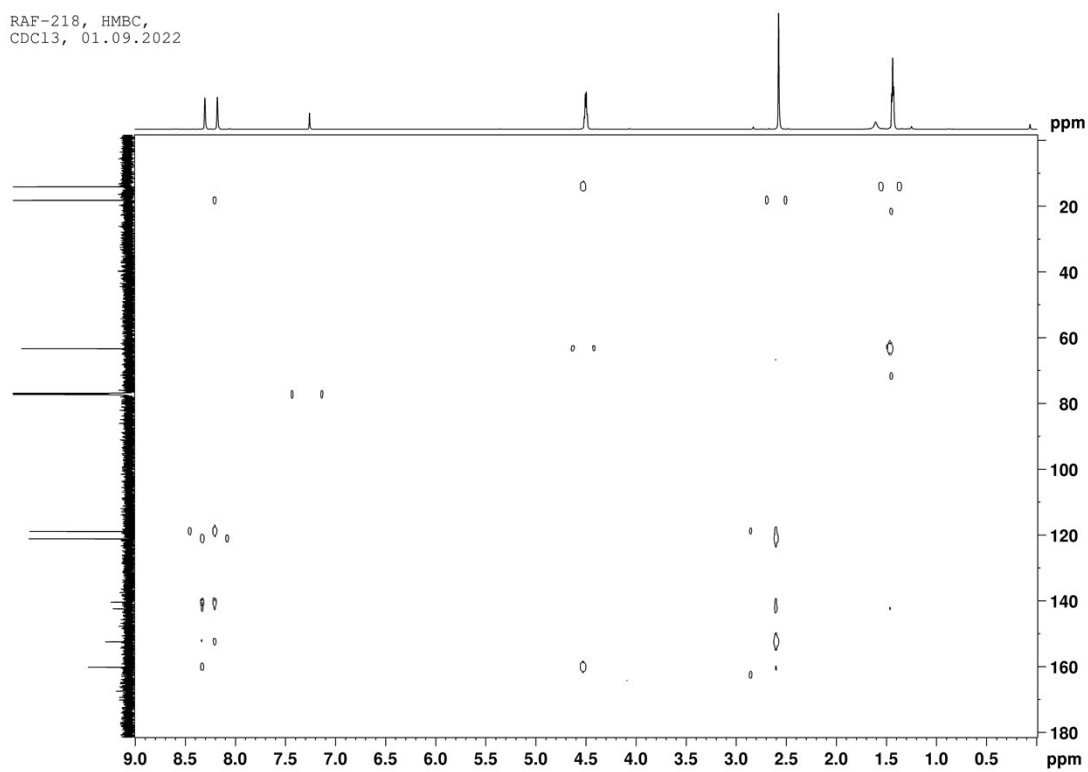

Figure S33: HMBC of S3.

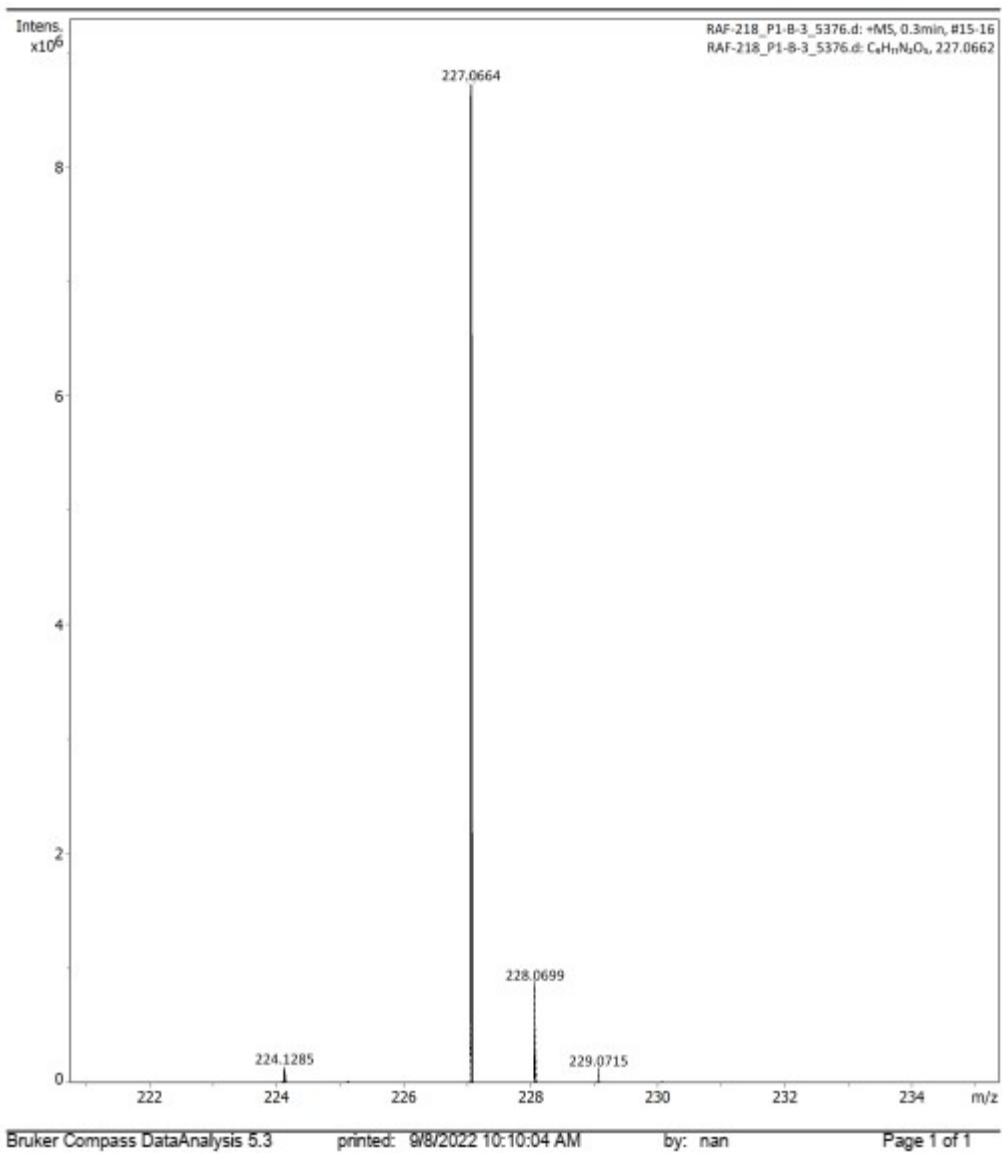

Figure S34: HR-ESI-MS of S3.

RAF-219, 1H,  
CD3CN, 01.09.2022

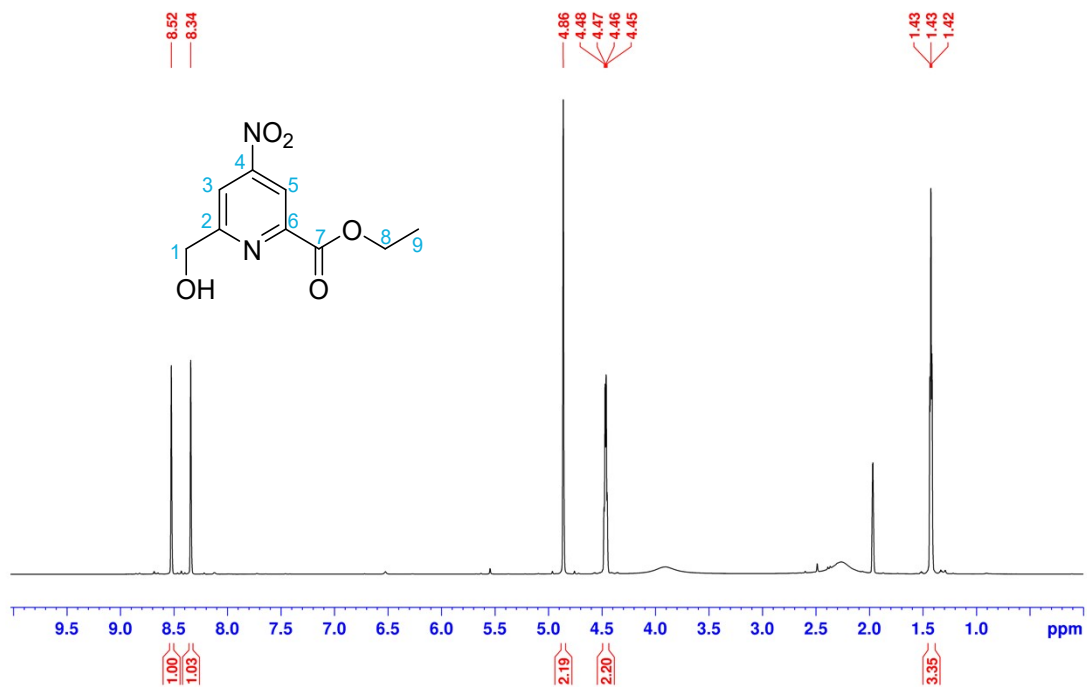

Figure S35: <sup>1</sup>H NMR of S4.

RAF-219, 13C,  
CD3CN, 01.09.2022

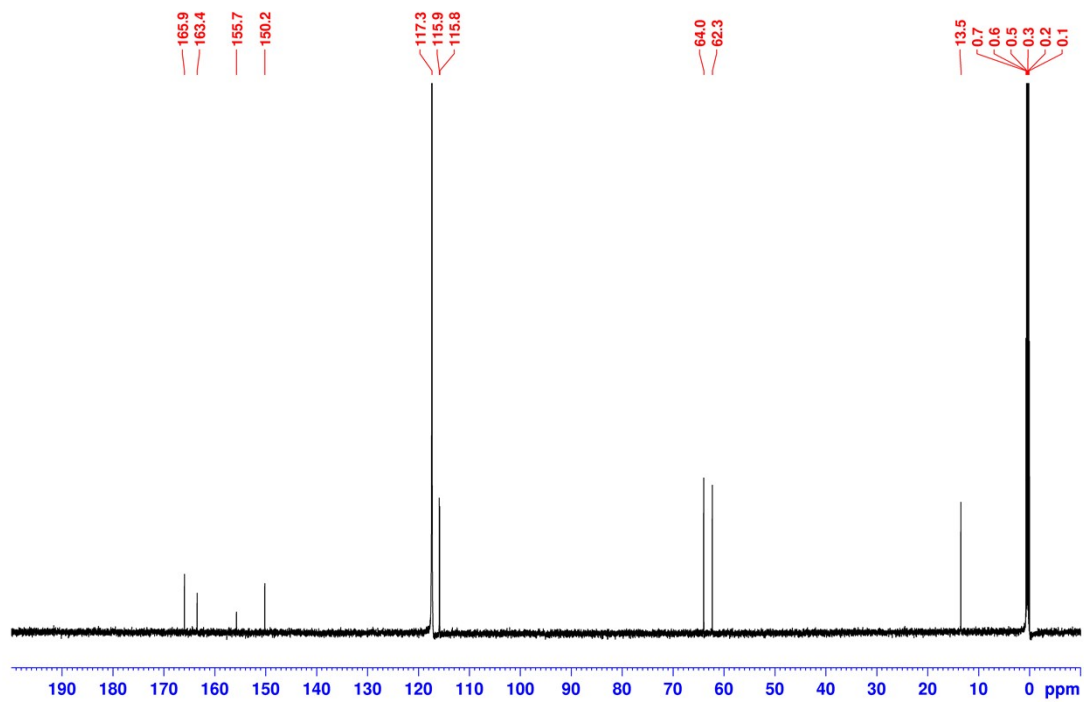

Figure S36: <sup>13</sup>C NMR of S4.

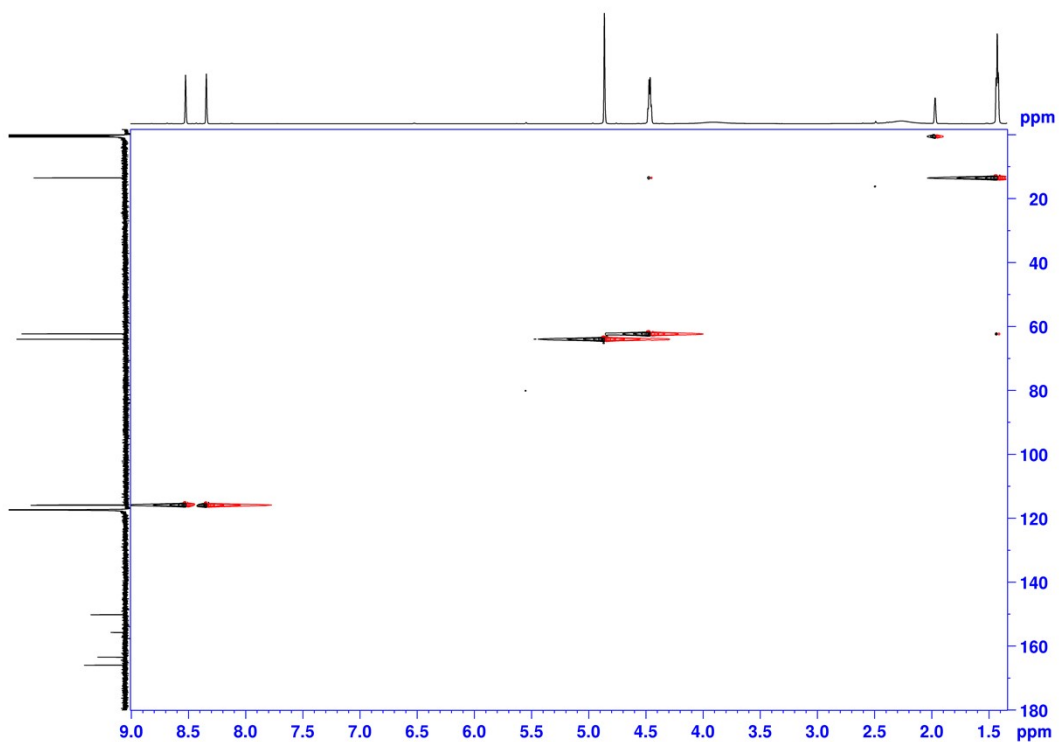

Figure S37: HSQC of S4.

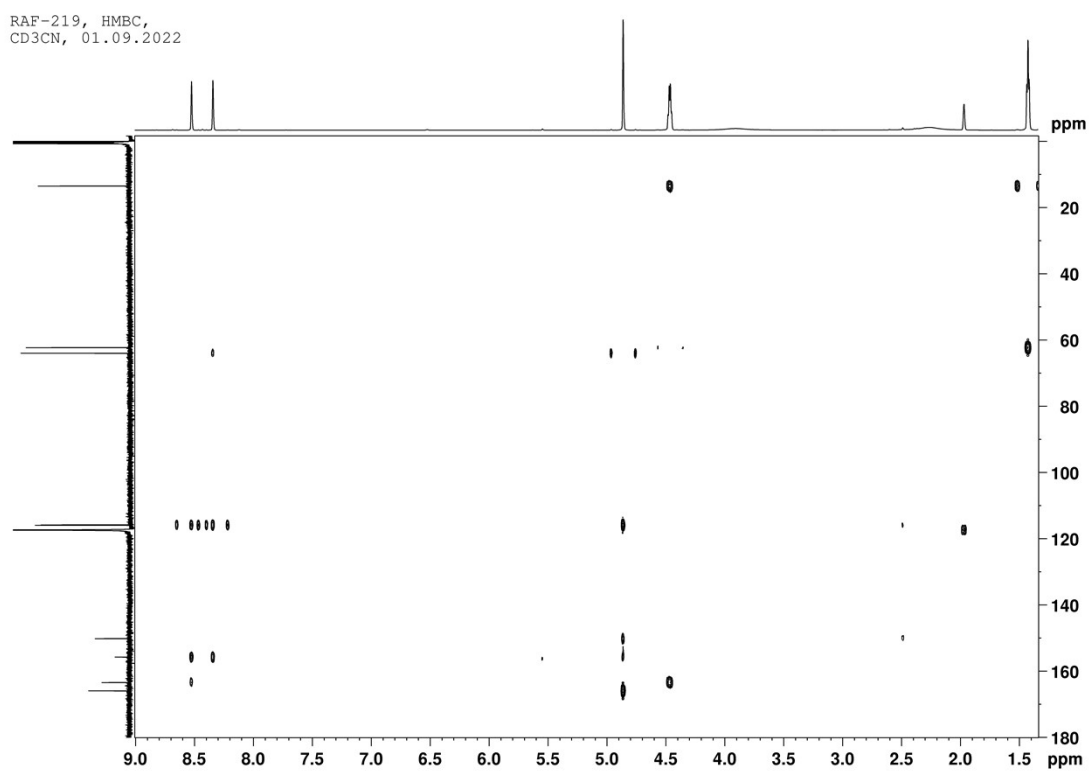

Figure S38: HMBC of S4.

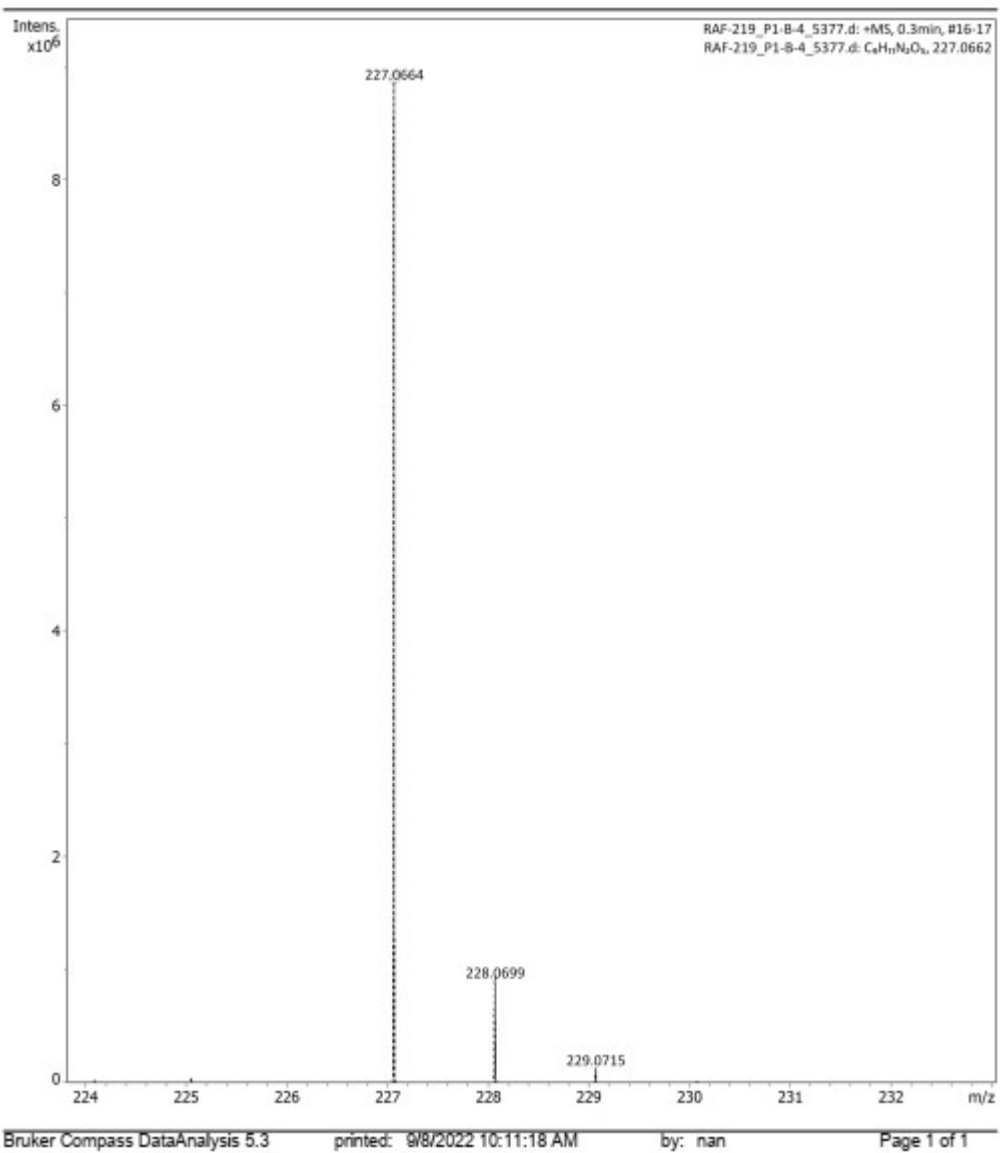

**Figure S39:** HR-ESI-MS of **S4**.



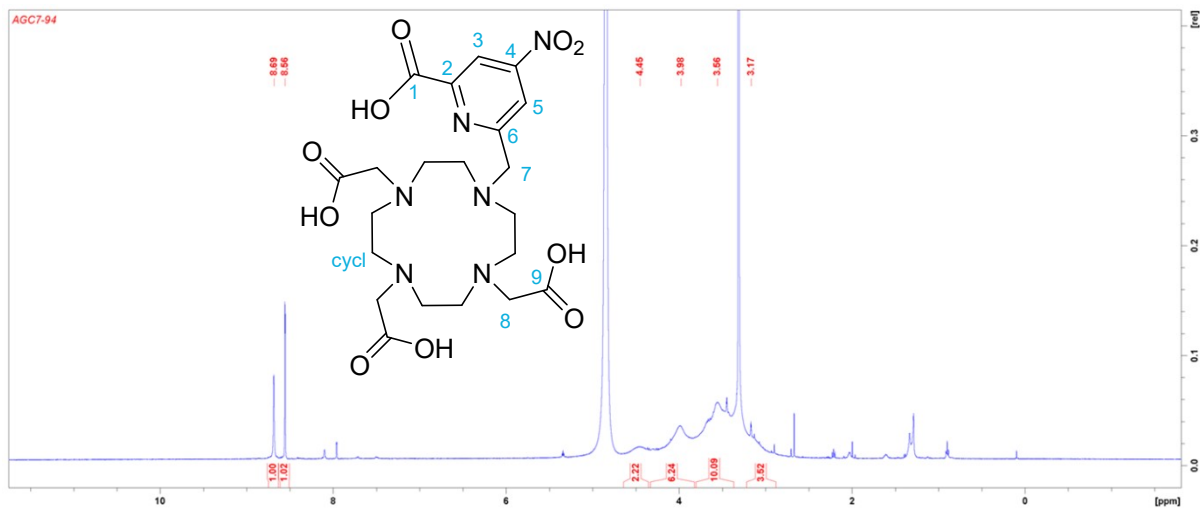

Figure S40: <sup>1</sup>H NMR of DO3Apic-NO<sub>2</sub>.

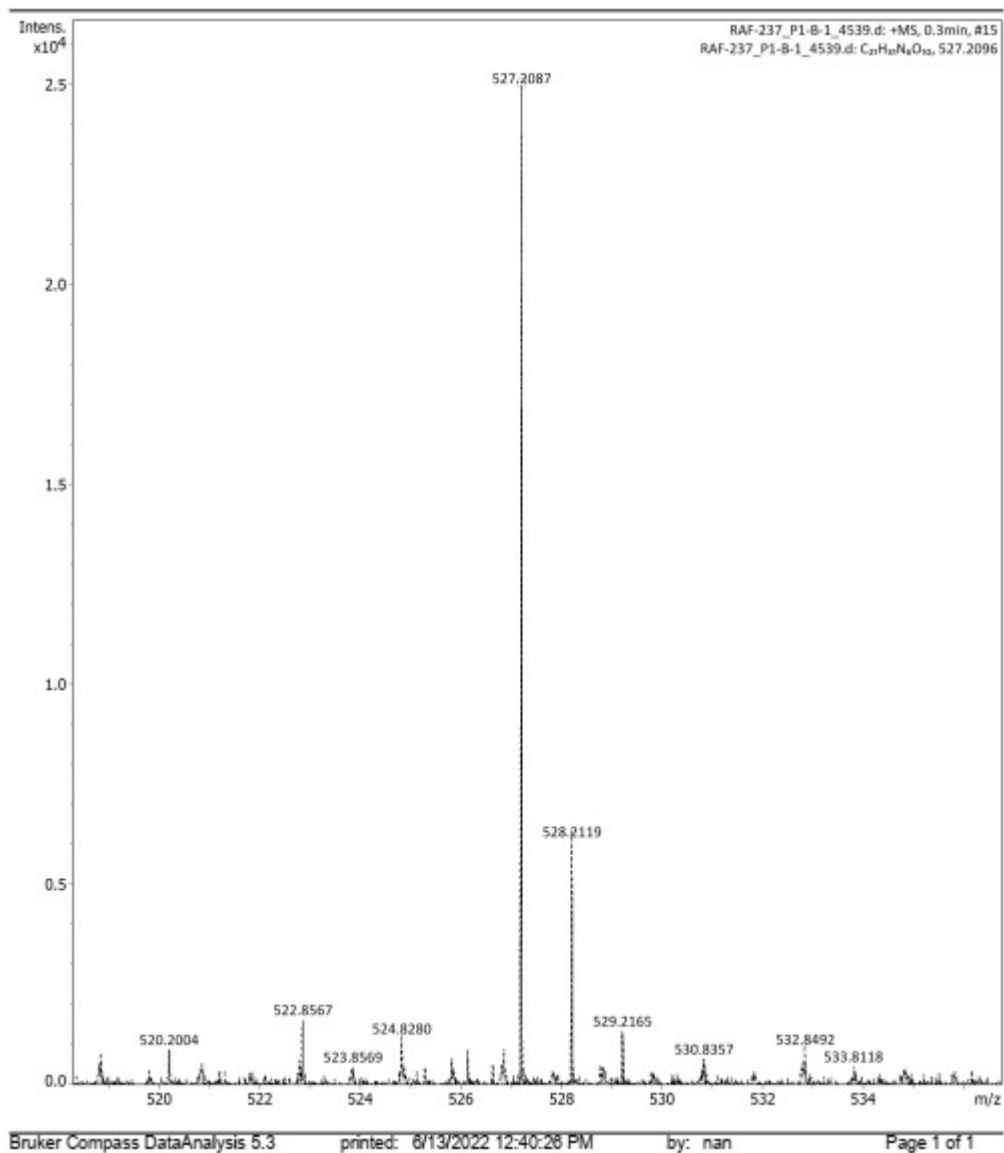

Figure S41: HR-ESI-MS of DO3Apic-NO<sub>2</sub>.

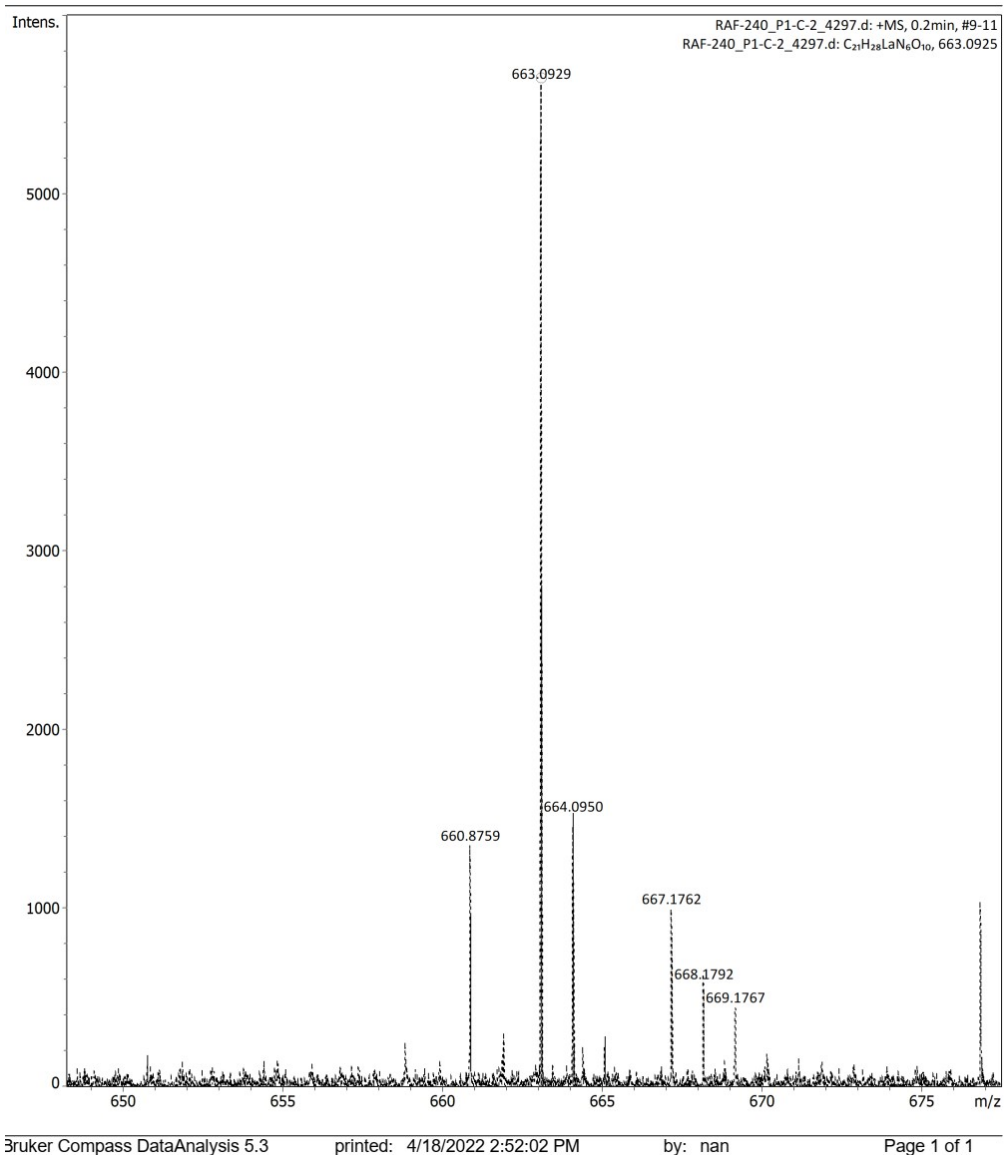

**Figure S42:** HR-ESI-MS of  $[\text{La}(\text{DO3Apic-NO}_2)]^-$ .

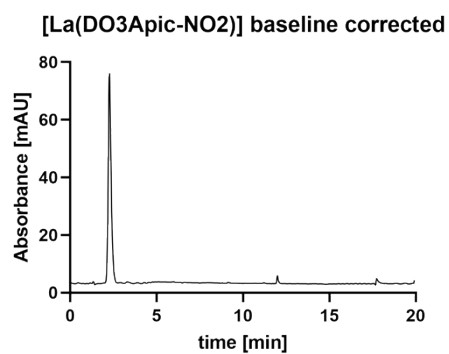

**Figure S43:** HPLC of  $[\text{La}(\text{DO3Apic-NO}_2)]^-$ .

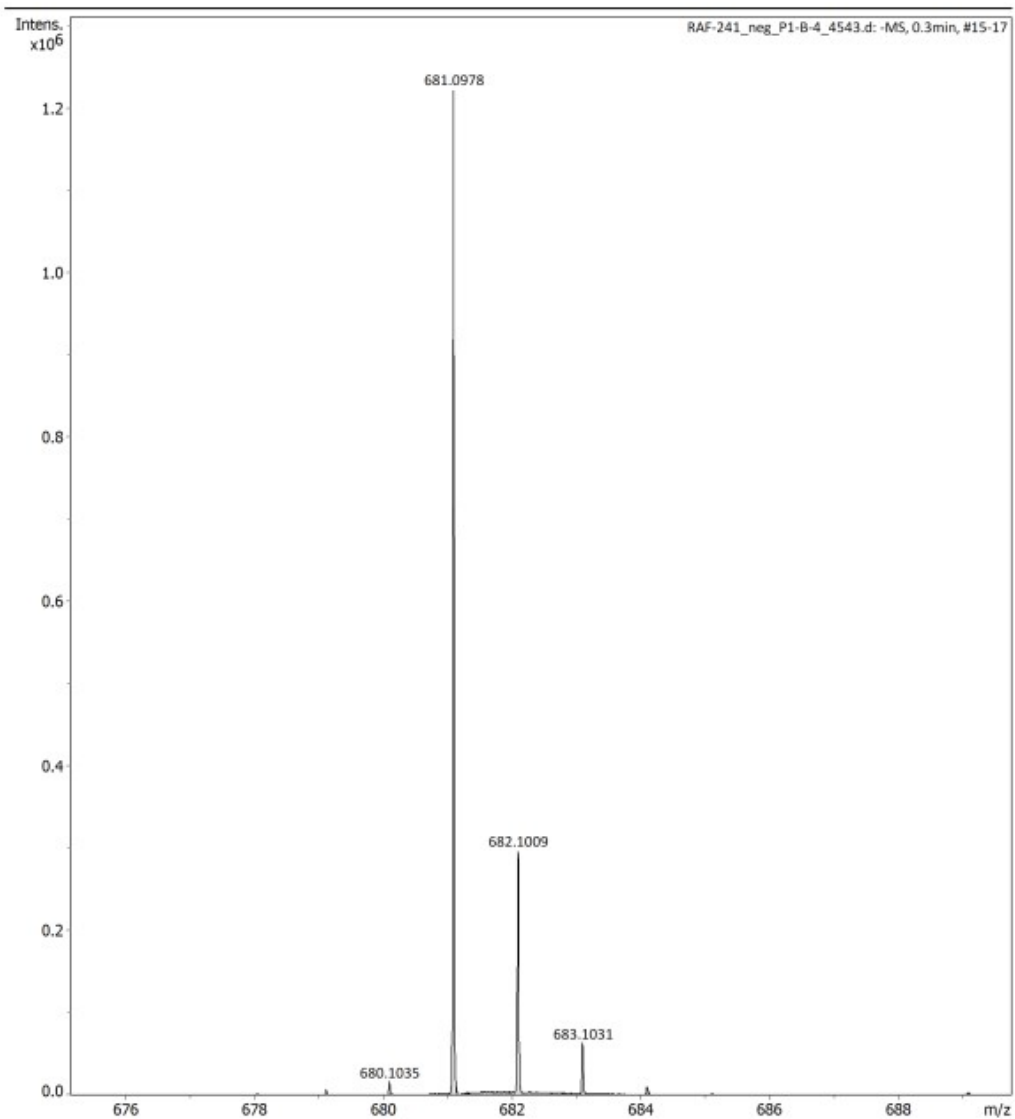

Bruker Compass DataAnalysis 5.3 printed: 6/13/2022 4:36:27 PM by: nan Page 1 of 1

Figure S44: HR-ESI-MS of [Tb(DO3Apic-NO<sub>2</sub>)].

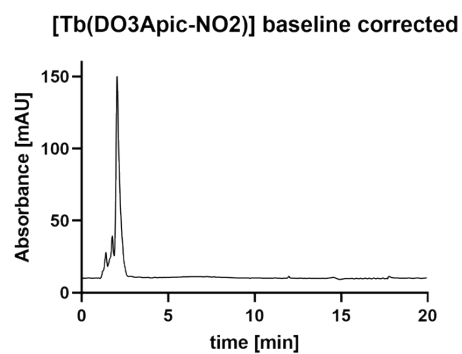

Figure S45: HPLC of [Tb(DO3Apic-NO<sub>2</sub>)].

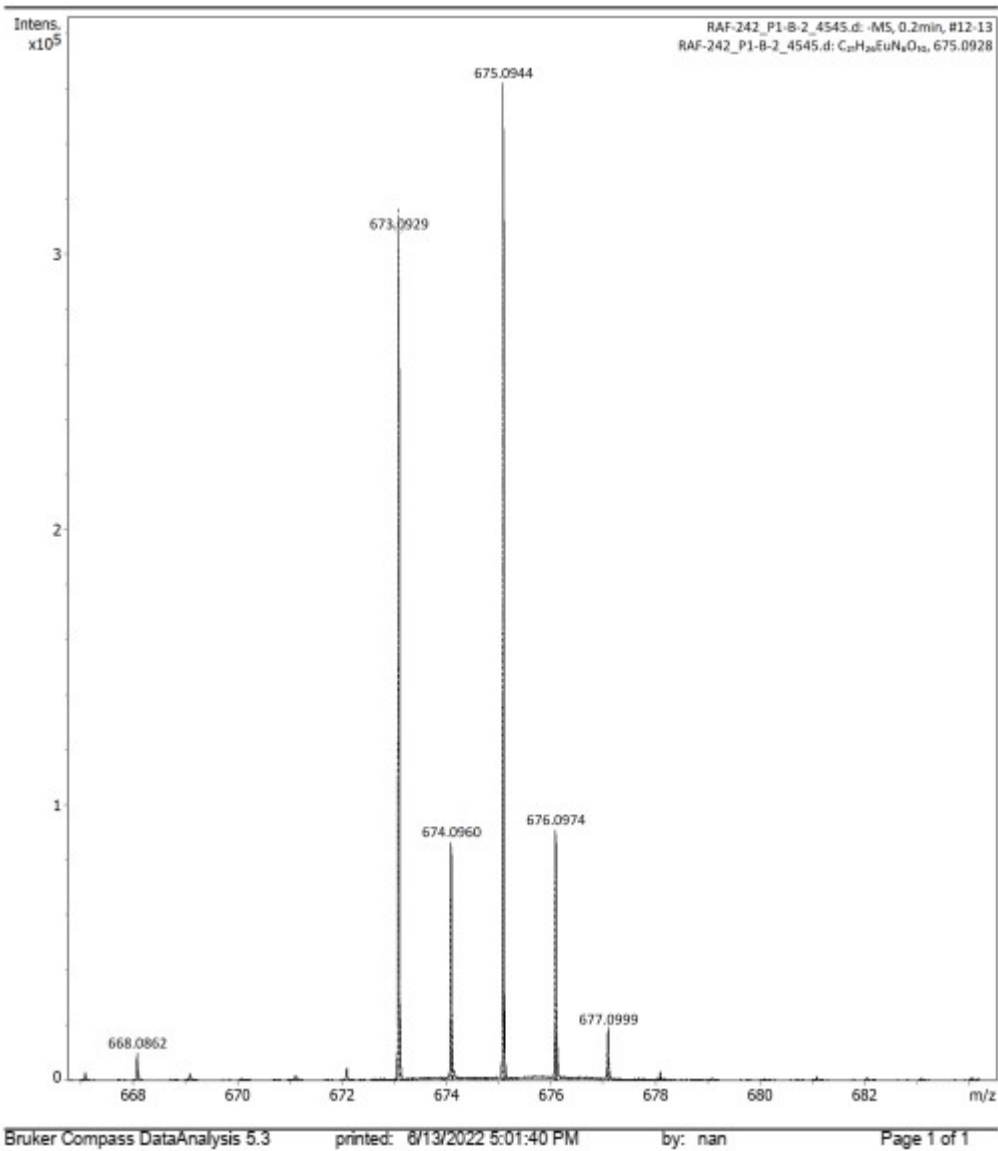

Figure S46: HR-ESI-MS of [Eu(DO3Apic-NO<sub>2</sub>)]<sup>-</sup>.

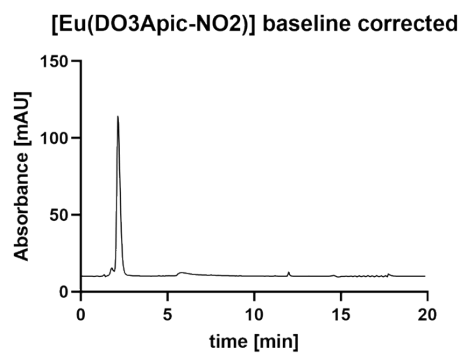

Figure S47: HPLC of [Eu(DO3Apic-NO<sub>2</sub>)]<sup>-</sup>.

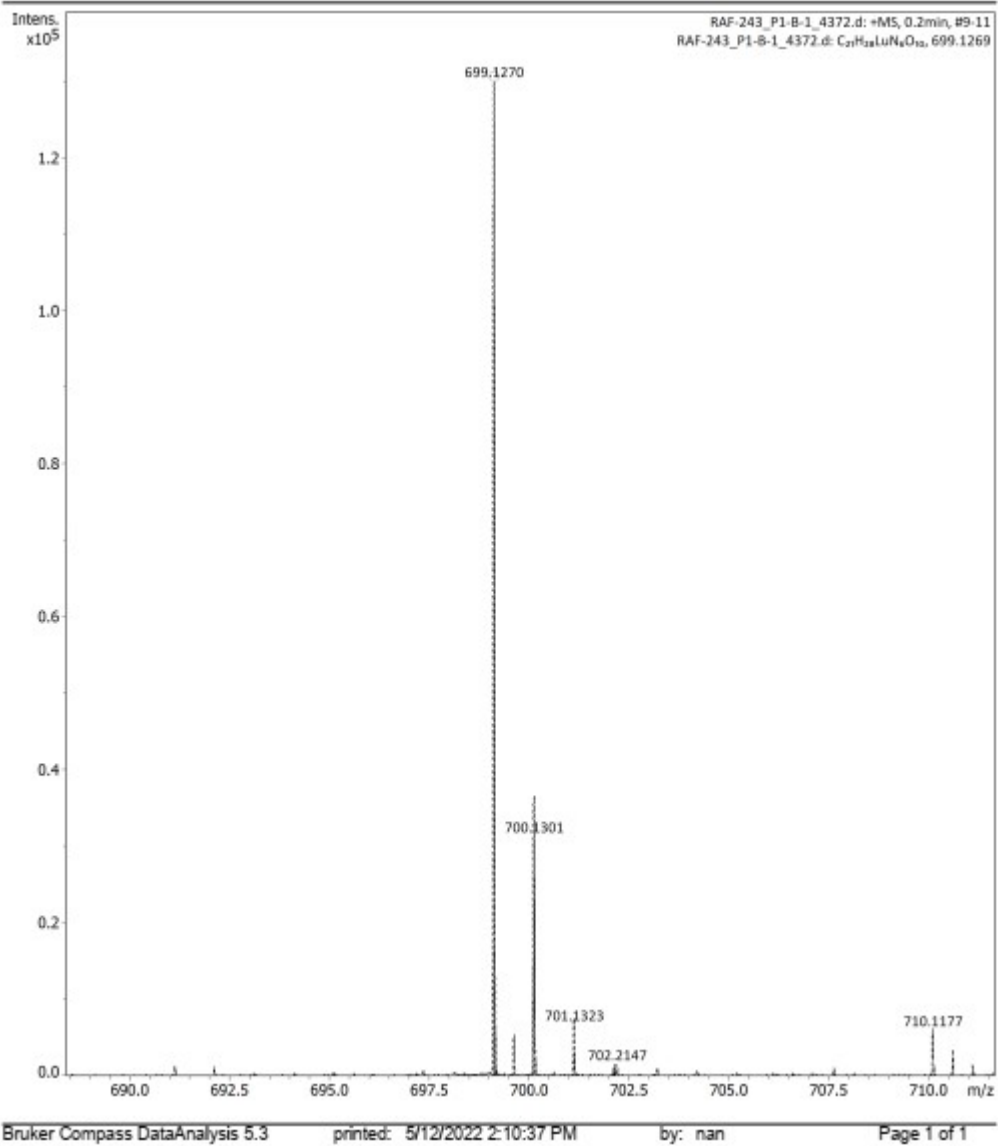

Figure S48: HR-ESI-MS of [Lu(DO3Apic-NO<sub>2</sub>)].

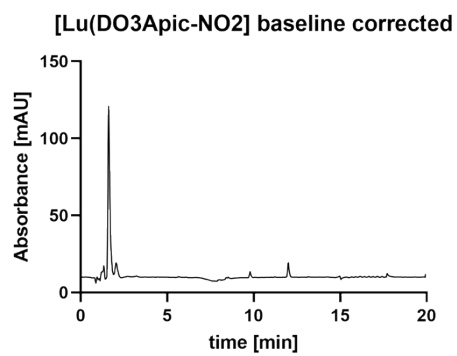

Figure S49: HPLC of [Lu(DO3Apic-NO<sub>2</sub>)].

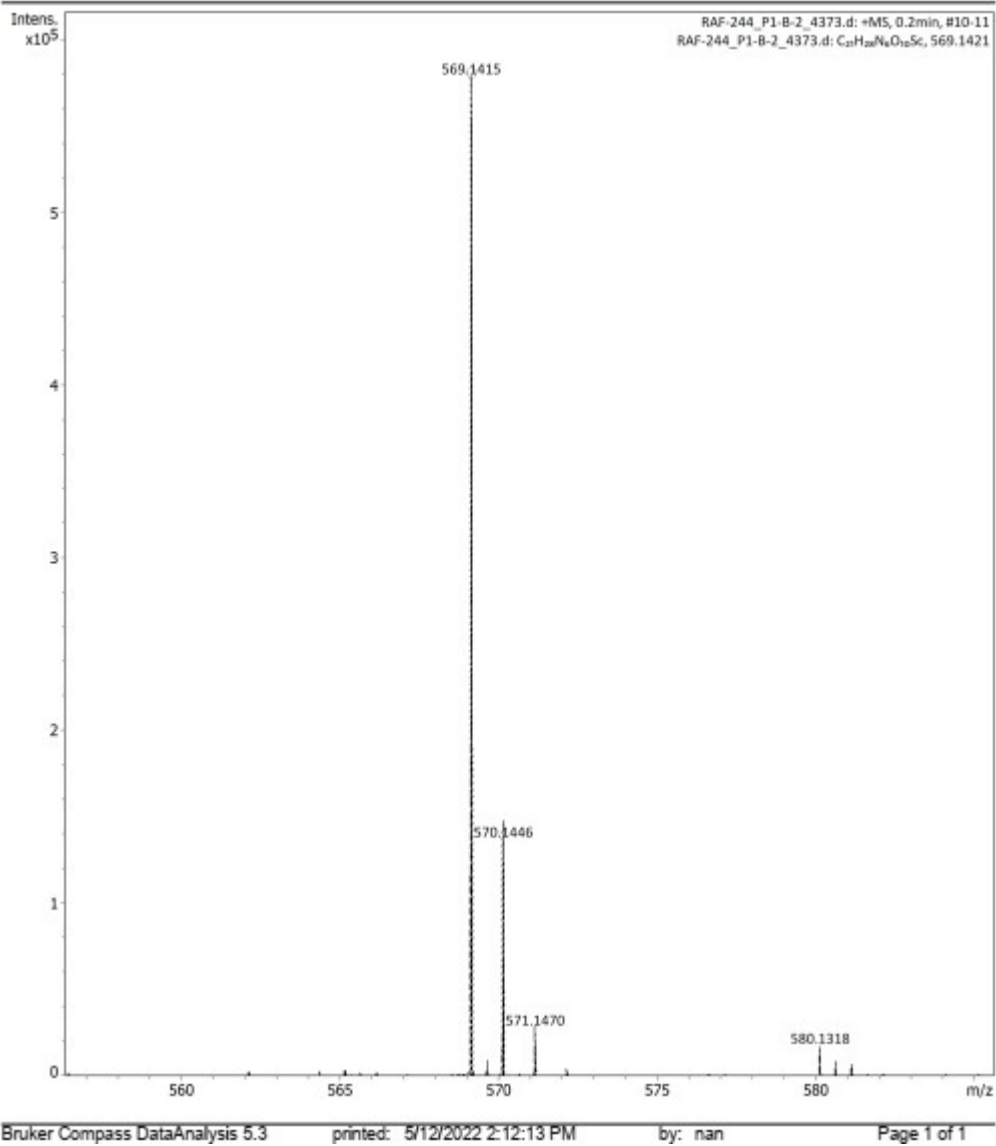

Figure S50: HR-ESI-MS of [Sc(DO3Apic-NO<sub>2</sub>)].

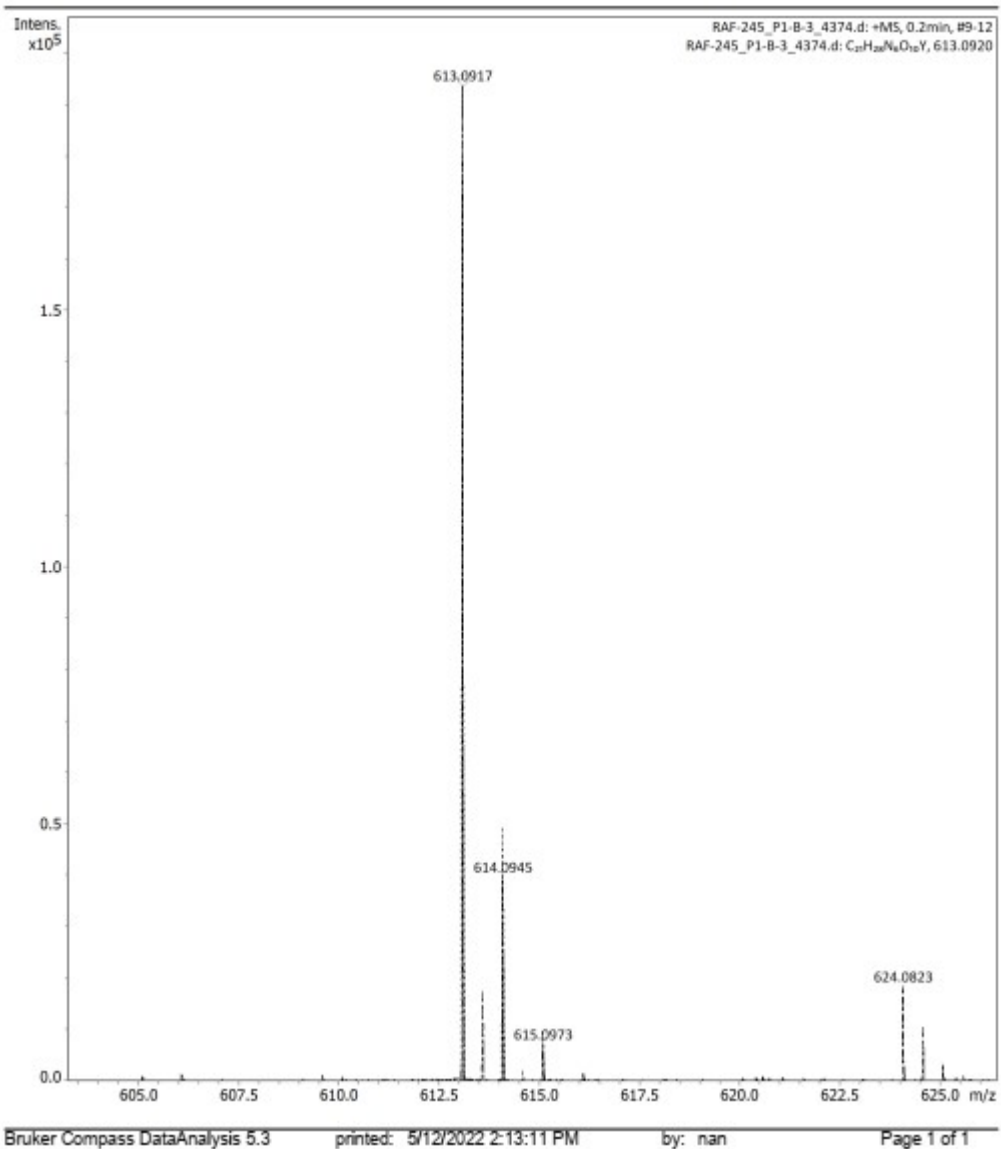

Figure S51: HR-ESI-MS of [Y(DO3Apic-NO<sub>2</sub>)].

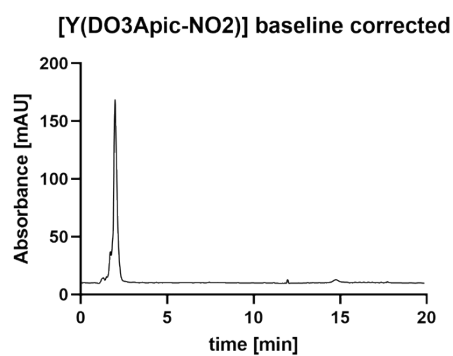

Figure S52: HPLC of [Y(DO3Apic-NO<sub>2</sub>)].

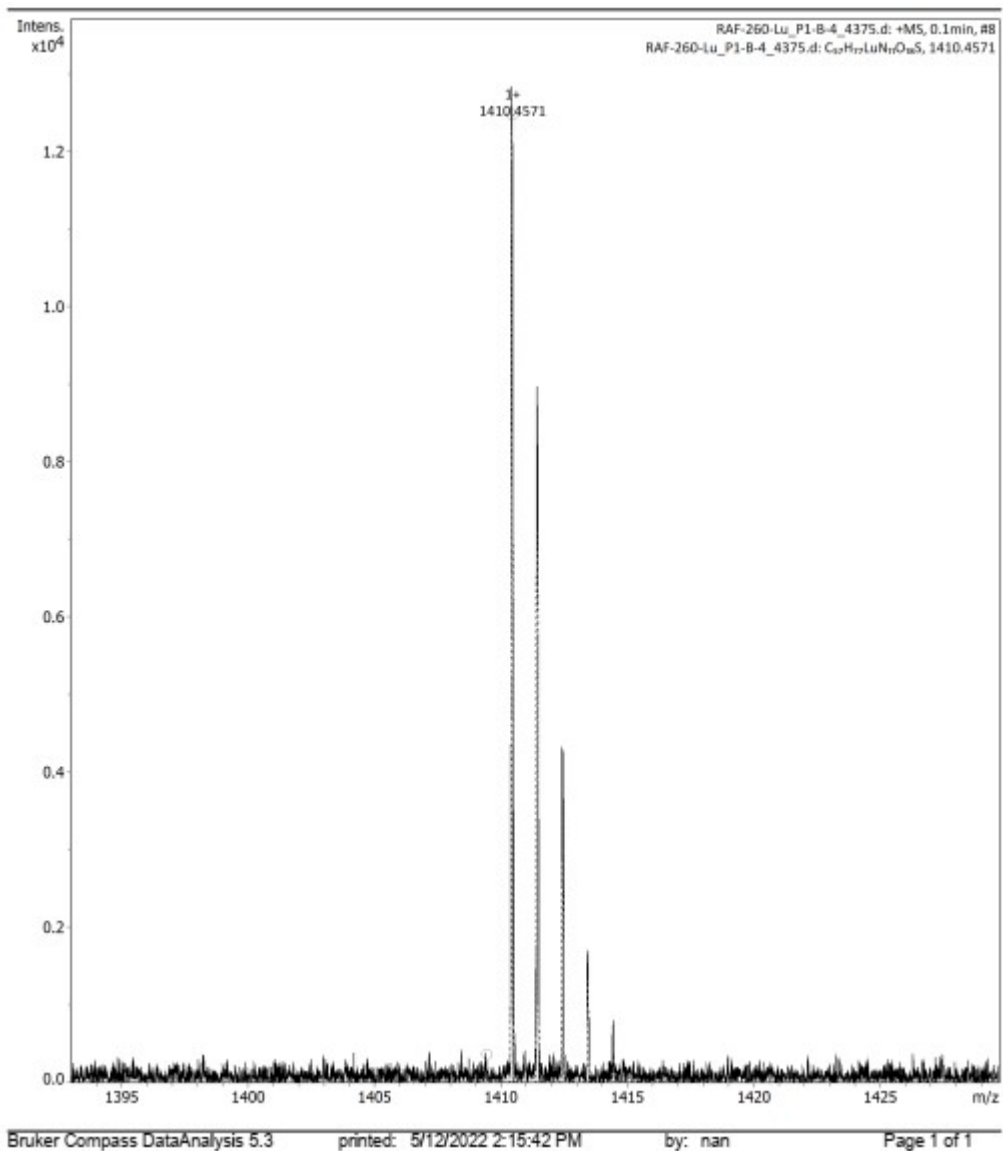

Figure S53: HR-ESI-MS of [Lu(DO3Apic-SR<sub>2</sub>)]<sup>-</sup>.

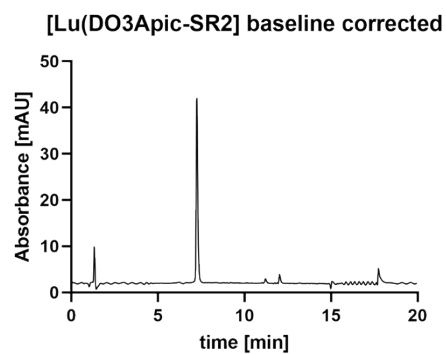

Figure S54: HPLC of [Lu(DO3Apic-SR<sub>2</sub>)]<sup>-</sup>.



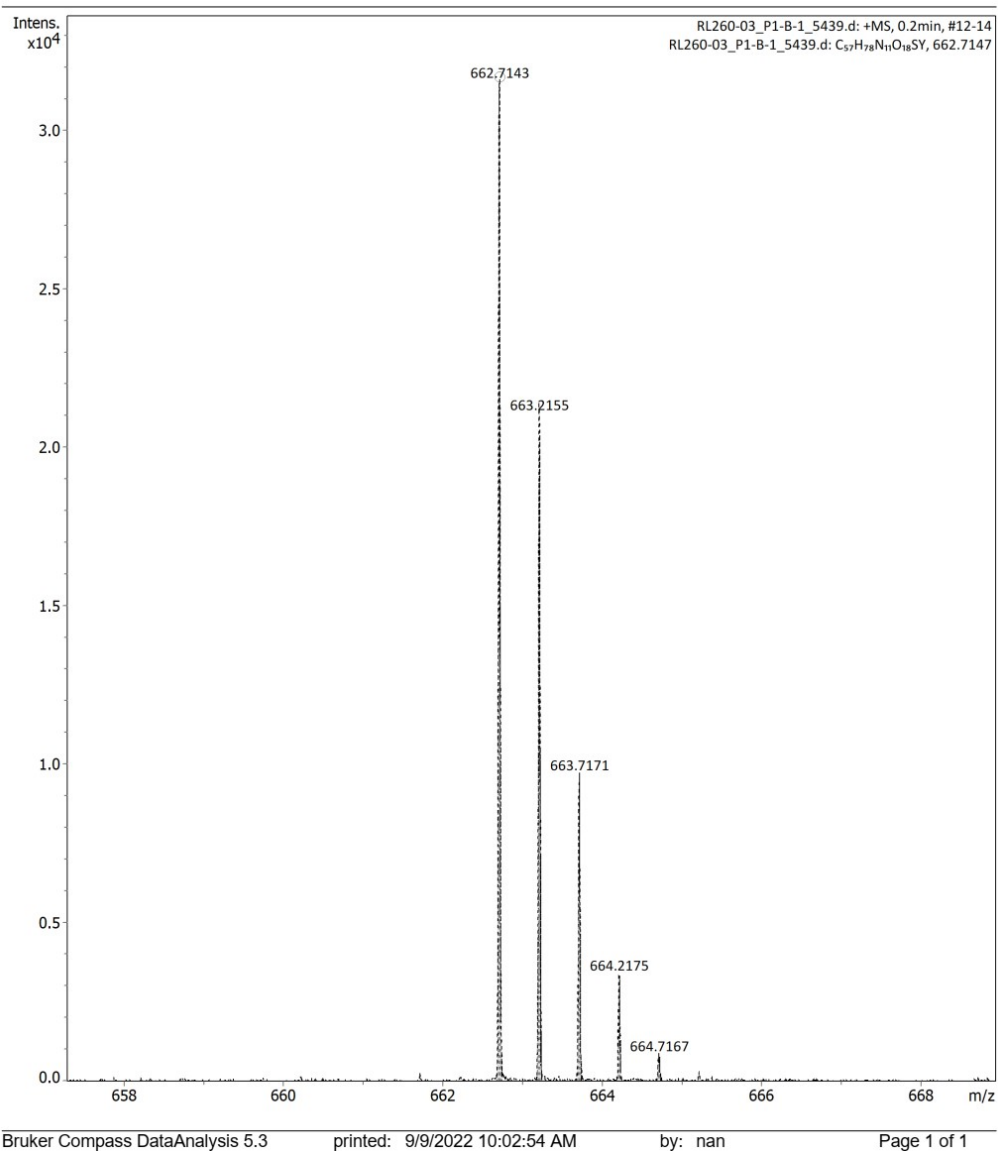

Figure S55: HR-ESI-MS of [Y(DO3Apic-SR<sub>2</sub>)]<sup>-</sup>.

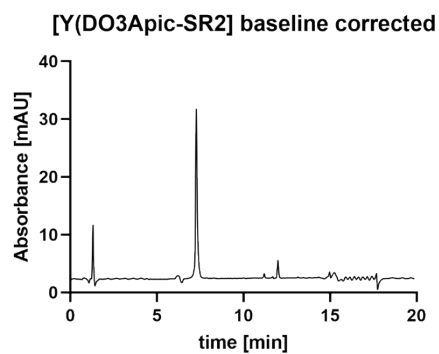

Figure S56: HPLC of [Y(DO3Apic-SR<sub>2</sub>)]<sup>-</sup>.

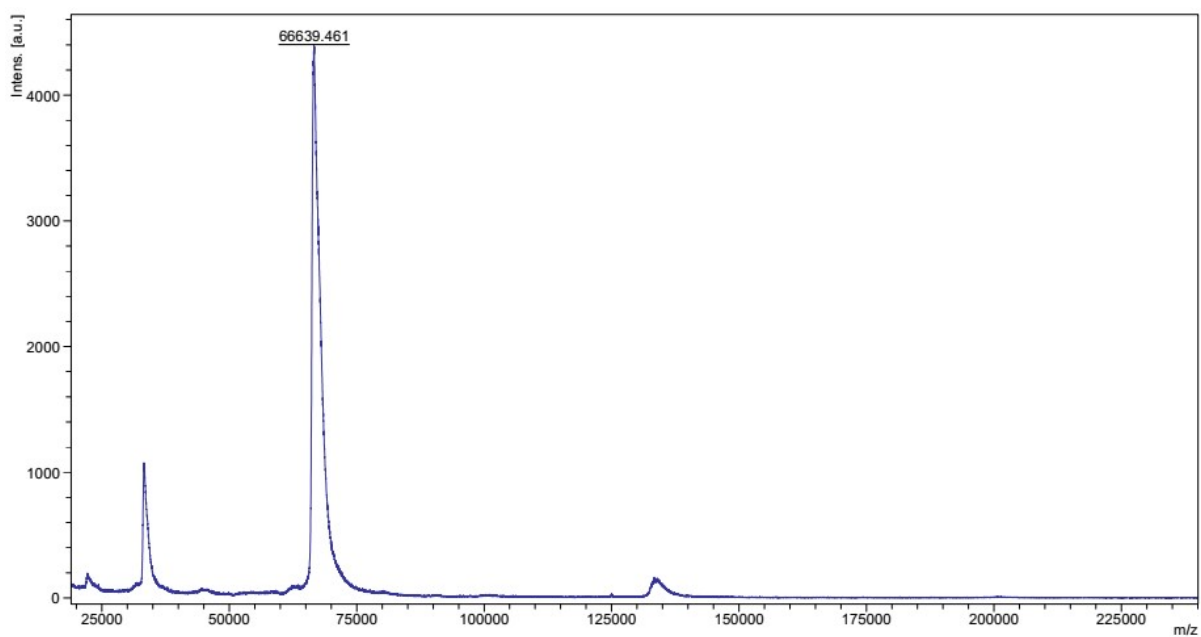

**Figure S57:** MALDI-TOF MS of BSA.

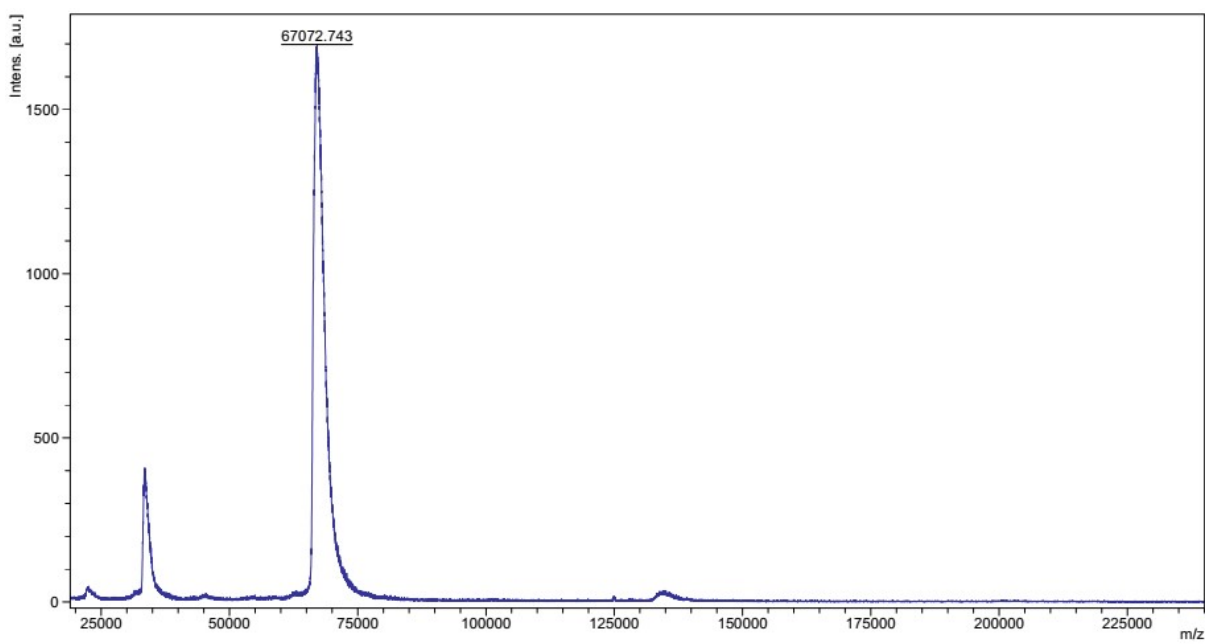

**Figure S58:** MALDI-TOF MS of BSA reacted with 100 equivalents of [La(DO3Apic-NO<sub>2</sub>)]<sup>-</sup>.

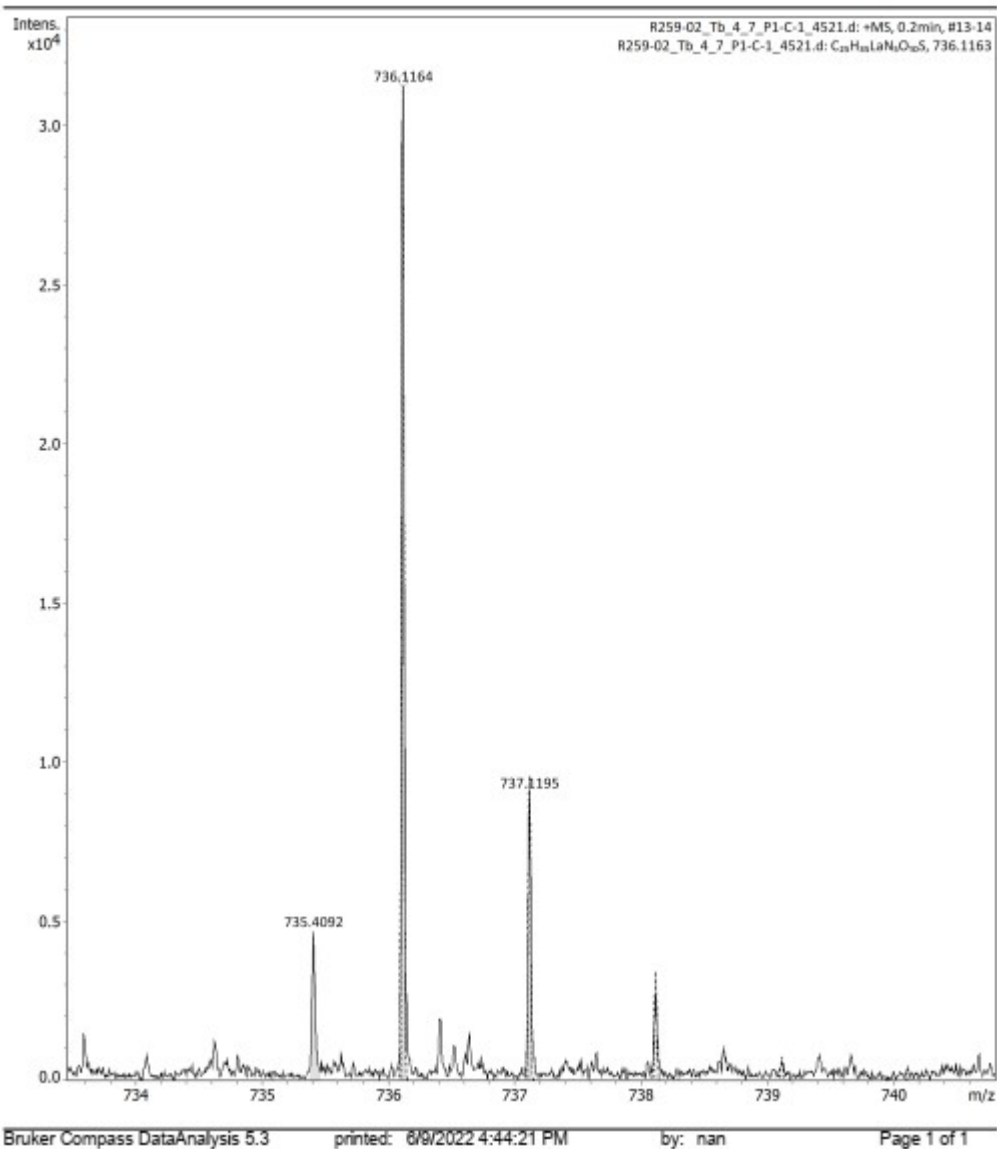

Figure S59: HR-ESI-MS of [La(DO3Apic-SR<sub>1</sub>)].

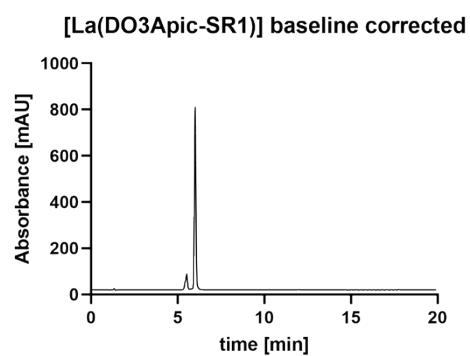

Figure S60: HPLC of [La(DO3Apic-SR<sub>1</sub>)].

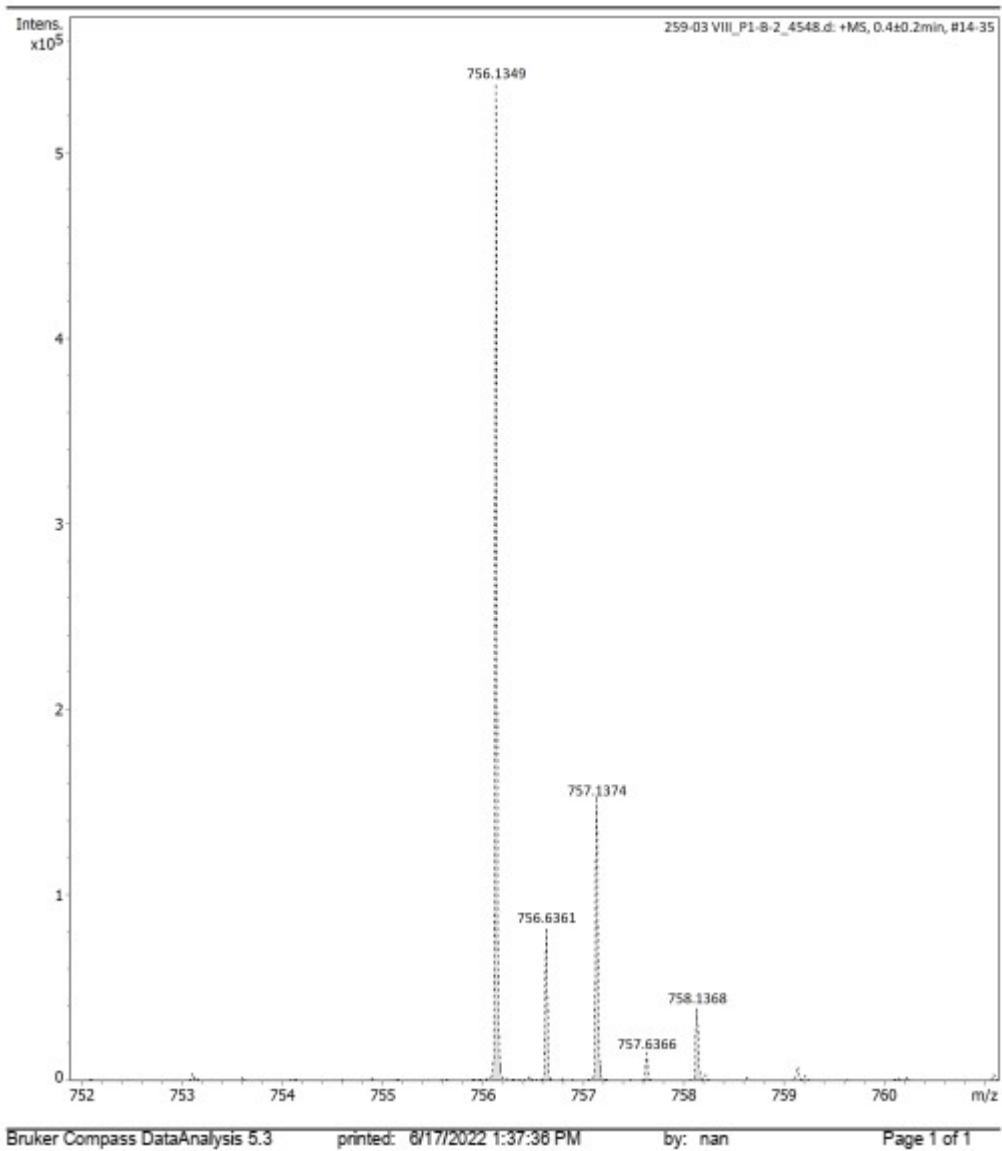

Figure S61: HR-ESI-MS of [Tb(DO3Apic-SR<sub>1</sub>)].

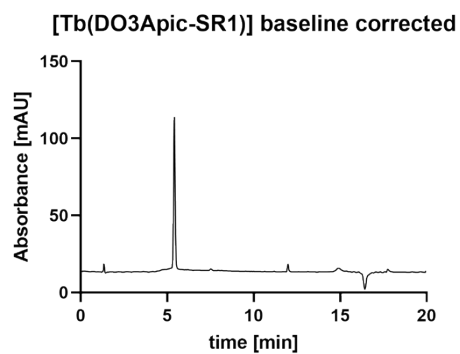

Figure S62: HPLC of [Tb(DO3Apic-SR<sub>1</sub>)].

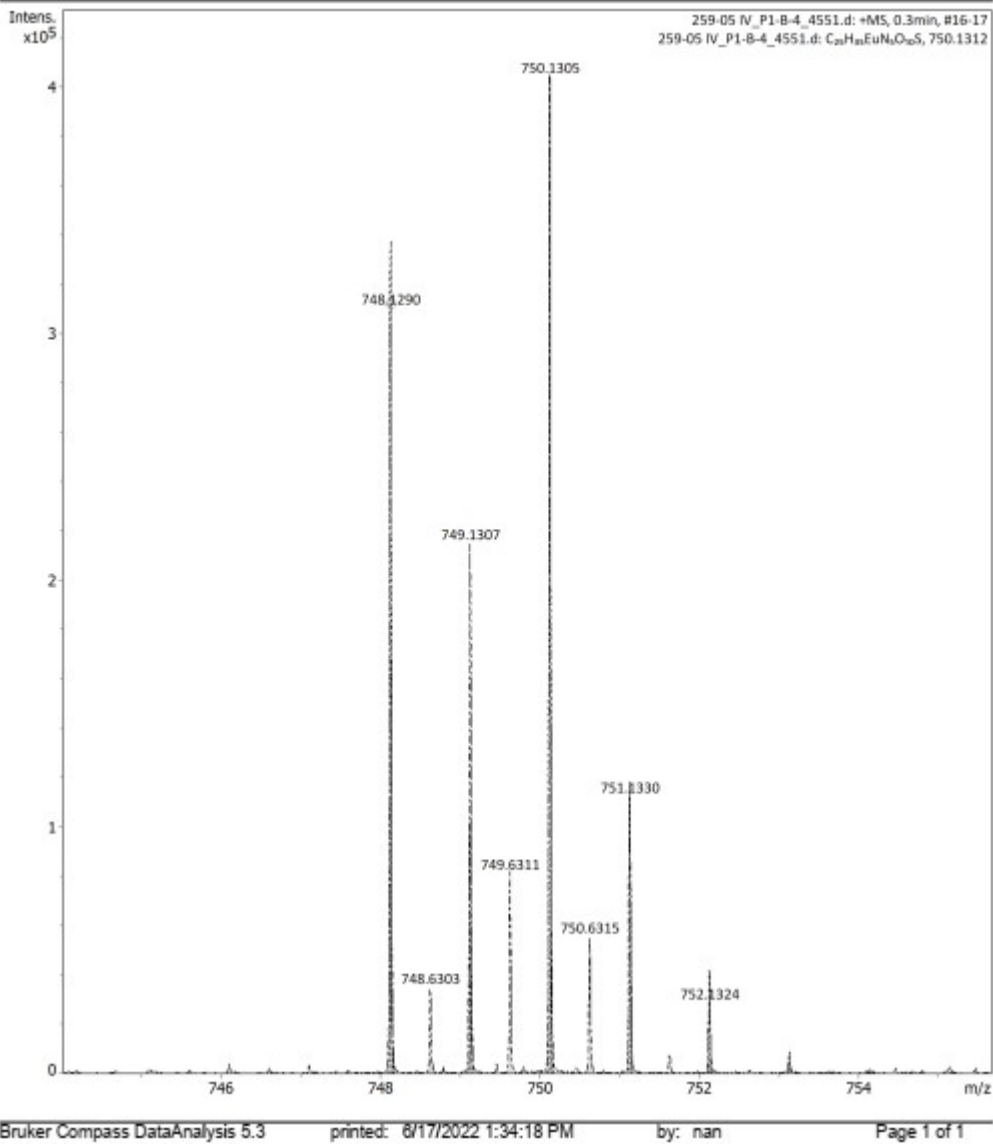

Figure S63: HR-ESI-MS of [Eu(DO3Apic-SR<sub>1</sub>)].

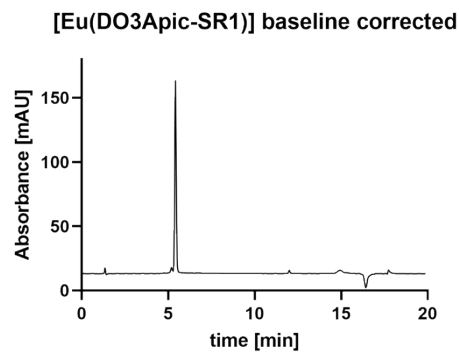

Figure S64: HPLC of [Eu(DO3Apic-SR<sub>1</sub>)].

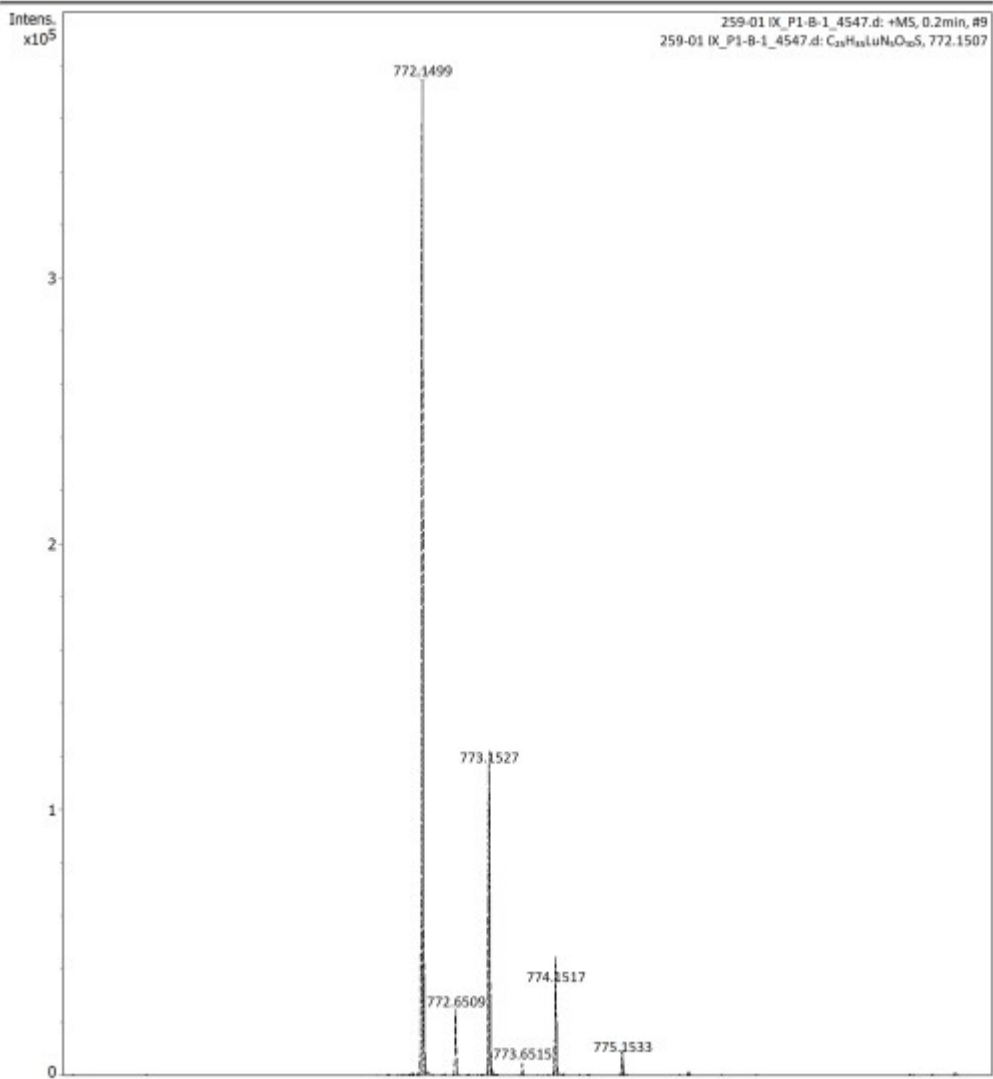

Figure S65: HR-ESI-MS of [Lu(DO3Apic-SR<sub>1</sub>)].

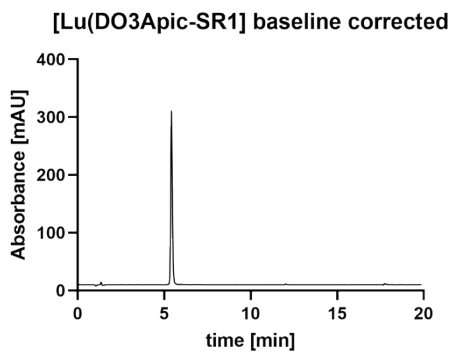

Figure S66: HPLC of [Lu(DO3Apic-SR<sub>1</sub>)].

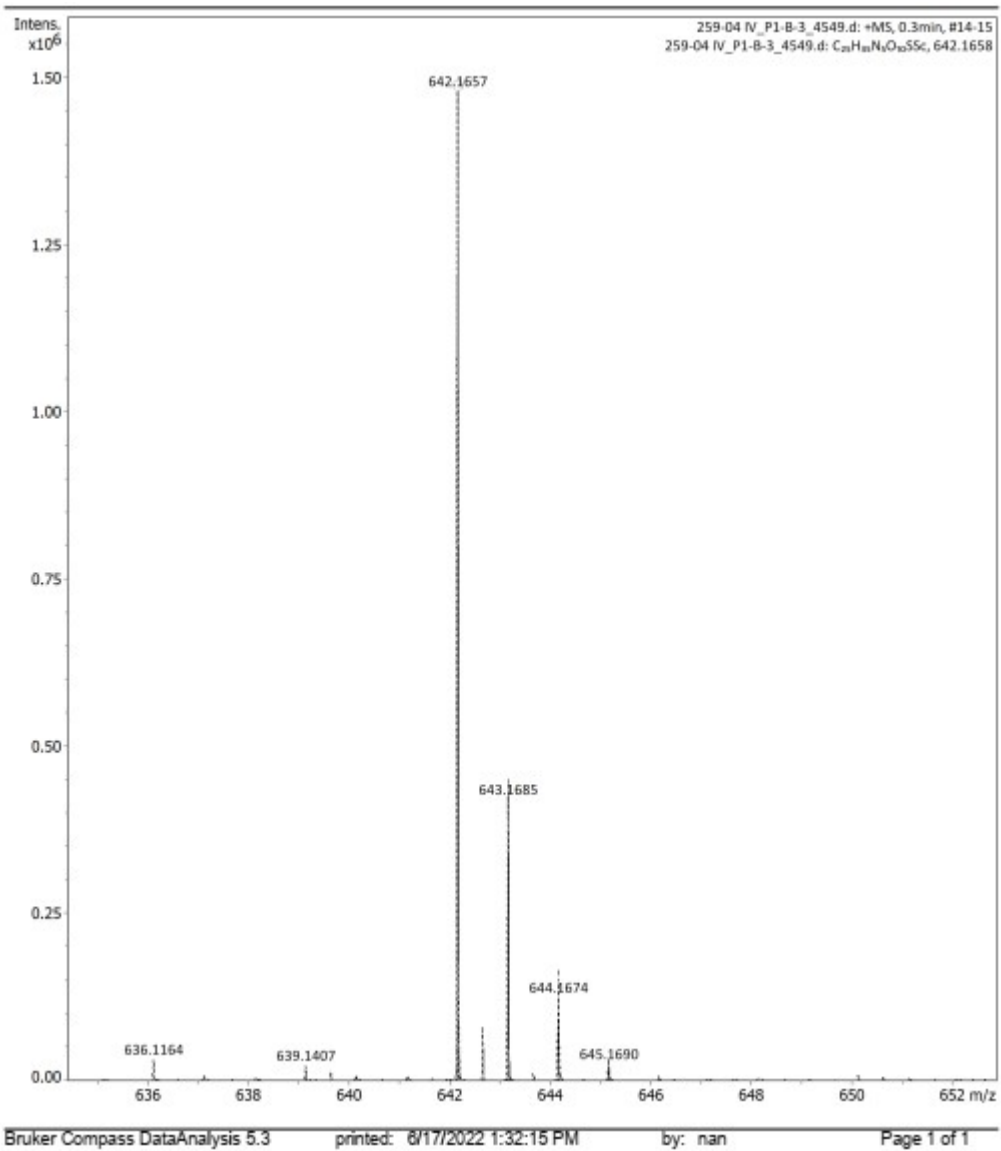

Figure S67: HR-ESI-MS of [Sc(DO3Apic-SR<sub>1</sub>)].

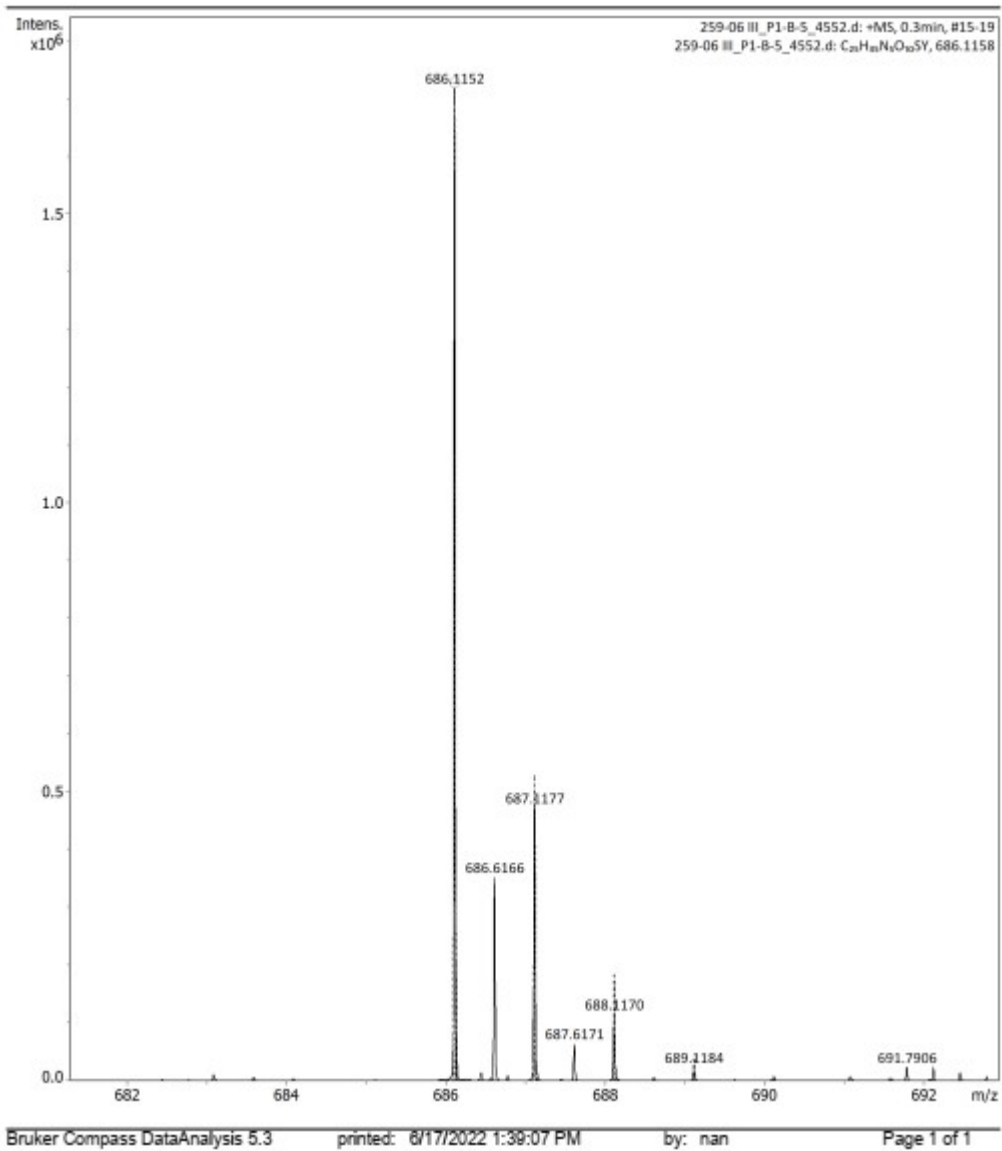

Figure S68: HR-ESI-MS of [Y(DO3Apic-SR<sub>1</sub>)].

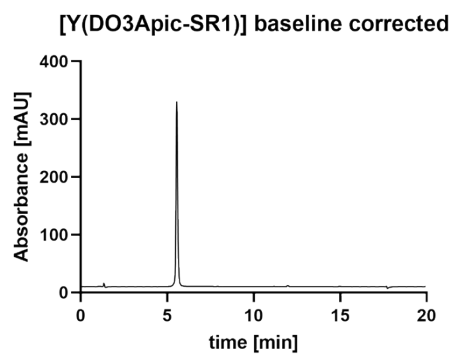

Figure S69: HPLC of [Y(DO3Apic-SR<sub>1</sub>)].



## References

1. A. Shah, A. Roux, M. Starck, J. A. Mosely, M. Stevens, D. G. Norman, R. I. Hunter, H. El Mkami, G. M. Smith, D. Parker and J. E. Lovett, *Inorg. Chem.*, 2019, **58**, 3015-3025.
2. K. L. Gempf, S. J. Butler, A. M. Funk and D. Parker, *Chem. Commun.*, 2013, **49**, 9104-9106.
3. A. Beeby, I. M. Clarkson, R. S. Dickins, S. Faulkner, D. Parker, L. Royle, A. S. de Sousa, J. A. Gareth Williams and M. Woods, *J. Chem. Soc., Perkin Trans. 2*, 1999, DOI: 10.1039/A808692C, 493-504.
4. A. G. Cosby, S. H. Ahn and E. Boros, *Angew. Chem. Int. Ed.*, 2018, **57**, 15496-15499.
